1 **Enhancing the biological relevance of Gene Co-expression Networks: A plant**  
2 **mitochondrial case study**

3

4 Simon R. Law<sup>1</sup>, Therese G. Kellgren<sup>2</sup>, Rafael Björk<sup>2</sup>, Patrik Ryden<sup>2\*</sup> and Olivier Keech<sup>1\*</sup>

5

6 <sup>1</sup> Department of Plant Physiology, UPSC, Umeå Universitet, 90187 Umeå, Sweden

7 <sup>2</sup> Department of Mathematics and Mathematical Statistics, Umeå Universitet, 90187 Umeå,

8 Sweden

9 \* Corresponding authors

10

11 [simon.law@umu.se](mailto:simon.law@umu.se)

12 [therese.kellgren@umu.se](mailto:therese.kellgren@umu.se)

13 [rafael.bjork@gmail.com](mailto:rafael.bjork@gmail.com)

14 [patrik.ryden@umu.se](mailto:patrik.ryden@umu.se)

15 [olivier.keech@umu.se](mailto:olivier.keech@umu.se)

16

17 **Author for correspondence:**

18 Olivier Keech

19 Department of Plant Physiology, Umeå Plant Science Centre, Umeå University, S-90187

20 Umeå, Sweden

21 e-mail: [olivier.keech@umu.se](mailto:olivier.keech@umu.se)

22

23 **Short title:** Impact of centralisation within sub experiments on gene co-expression networks

24

25

26 **Abstract**

27 Gene Co-expression Networks (GCNs) are obtained by a variety of mathematical of models

28 commonly derived on data sampled from diverse developmental processes, tissue types,

29 pathologies, mutant backgrounds, and stress conditions. These networks aim to identify genes  
30 with similar expression dynamics, but are prone to introduce false-positive and -negative  
31 relations, especially in the instance of large and highly complex datasets. With the aim of  
32 optimizing the relevance of edges in GCNs and enhancing global biological insight, we propose  
33 a novel approach that involves a data-centering step performed simultaneously per gene and  
34 per sub-experiment, called *centralisation within sub-experiments* (CSE).

35 Using a gene set encoding for the plant mitochondrial proteome as a case study, our results  
36 show that CSE-based GCNs had significantly more edges within the majority of the considered  
37 functional sub-networks, such as the mitochondrial electron transport chain and its sub-  
38 complexes, than GCNs not using CSE; thus demonstrating that the CSE-based GCNs are  
39 efficient at predicting those canonical functions and associated pathways, also referred to as  
40 the “core network”. Furthermore, we show that CSE, in conjunction with conventional  
41 correlation analyses can be used to fine-tune the prediction of the function for uncharacterised  
42 genes; while in combination with analyses based on non-centralised data can augment those  
43 conventional stress analyses with the innate connections underpinning the dynamic system  
44 examined.

45 Therefore, CSE appears as an alternative method to conventional batch correction  
46 approaches. The method is easy to implement into a pre-existing GCN analysis pipeline and  
47 can provide accentuated biological relevance to conventional GCNs by allowing users to  
48 delineate a “core” gene network.

49

## 50 **Author Summary**

51 Gene Co-expression networks (GCNs) are the product of a variety of mathematical models  
52 that identify causal relationships in gene expression dynamics, but are prone to the  
53 misdiagnoses of false -positives and -negatives, especially in the instance of large and highly  
54 complex datasets. In light of the burgeoning output of next generation sequencing projects  
55 performed on any species, under different developmental or clinical conditions, the statistical  
56 power and complexity of these networks will undoubtedly increase, while their biological

57 relevance will be fiercely challenged. Here, we propose a novel approach to primarily generate  
58 a “core” GCN with augmented biological relevance. Our method, which involves data-centering  
59 steps and thus effectively removes all primary treatment / tissue /patient effects, is simple to  
60 employ and can be easily implemented into pre-existing GCN analysis pipelines. The gained  
61 biological relevance of such an approach was validated using a subcellular gene set encoding  
62 for the plant mitochondrial proteome, and by applying numerous steps to challenge its  
63 application.

64

## 65 **Keywords**

66 Correlation, gene co-expression network, metabolism, method, mitochondria, plant

67

## 68 **Introduction**

69 Over the last two decades, the exponential growth of available transcriptome data in an  
70 increasing number of species has given rise to the establishment of a multitude of gene co-  
71 expression networks (GCNs). By constructing these networks on data sampled from diverse  
72 developmental processes, tissue types, pathologies, mutant backgrounds or stress conditions,  
73 researchers can better comprehend the physiological and molecular pathways that underpin  
74 complex biological systems (Carrera et al., 2009; Emmert-Streib et al. 2014; Castro et al.  
75 2019). These networks are reliant on mathematical models to identify causal relationships in  
76 gene expression dynamics, and although there are many different permutations of these  
77 models, the most prevalent are those based on conventional correlation approaches such as  
78 Pearson correlation coefficient or Spearman’s rank correlation coefficient.

79

80 These conventional correlation methods have been demonstrably successful at identifying  
81 cohorts of strongly co-expressed genes, and thus extensively used to generate GCNs;  
82 however, these methods also have their drawbacks. This is especially apparent in large and  
83 complex datasets where a large fraction of the predicted correlations are expected to be  
84 statistically significant, and causal gene-to-gene connections are obscured by the over-

85   whelming presence of false -positives and -negatives. Non-causal relationships can arise from  
86   indirect connections with other gene products and from non-biological sources such as  
87   influences stemming from experimental design. Partial correlation is a standard approach used  
88   to attenuate non-causal relationships generated by the influence of other genes. One such  
89   approach, Gaussian Graphical Modelling, is commonly used as it allows researchers to  
90   interrogate the direct association between two genes, independent of the effects of  
91   surrounding genes present in the dataset. A number of thorough Gaussian Graphical Modelling  
92   studies in the model plant species *Arabidopsis thaliana* (*Arabidopsis*) have demonstrated the  
93   statistical power of this technique, and generated GCNs of select pathways and on a genome-  
94   wide scale (Wille et al., 2004; Ma et al., 2007; Ma et al., 2015). Another useful step for  
95   analysing complex datasets encompassing a wide range of tissues, developmental stages and  
96   stresses, is the use of batch-effect removal approaches. Conventional batch-effect removal  
97   approaches effectively eliminate the systematic, technical errors inherent to multi-experiment  
98   comparisons (Chen et al. 2011; Nygaard et al. 2016). However, GCNs obtained utilizing partial  
99   correlation and batch-effect removal approaches will not reduce non-causal relationships  
100   caused by unquantifiable factors, e.g. treatment/tissue effects between samples. Hence, there  
101   is currently a lack of methodology to robustly derive informative GCNs from complex datasets  
102   generated by multiple experiments.

103

104   Although these GCNs are not an end on to themselves, they can be utilised in a number of  
105   innovative ways to reveal evidence of functions for otherwise uncharacterised gene products,  
106   identify novel protein localisation, and to better describe complex biological pathways which  
107   can react fluidly to different stresses/developmental processes. In the field of plant science,  
108   GCN inferences have been utilised to great effect, particularly in the model species  
109   *Arabidopsis*, both to construct genome-spanning global networks and biological sub-pathways  
110   (Liesecke et al., 2018). Yet, beyond its statistical value, the biological relevance of an edge  
111   between two nodes in such networks can rightfully be questioned. Furthermore, validation of  
112   GCNs can be challenging, as there are a limited number of gene-to-gene relationships

113 demonstrated to be positive (i.e. a causal relationship) or negative (i.e. a non-causal  
114 relationship) (Qian and Dougherty, 2013; Chai et al. 2014; Banf and Rhee, 2017). An  
115 alternative is to base the validation (i.e. the biological relevance of the output) on functional  
116 proximity and functional categories, arguing that the fraction of causal relationships should be  
117 relatively high within sets of genes encoding proteins that comprise the same protein complex  
118 or are involved in the same metabolic pathway.

119  
120 With the aim of optimizing the biological relevance of edges in GCNs and enhancing global  
121 biological insight, we challenged different methodologies in the generation of these networks  
122 by using, for biological validation, a subset of nuclear genes encoding plant mitochondrial-  
123 targeted proteins (As defined in Chrobok et al., 2016). To achieve this, we applied a novel pre-  
124 processing step that we called *centralisation within sub-experiments* (CSE), which removes  
125 batch-effects and reduces the impact of confounding effects of treatment-induced and tissue-  
126 specific responses. In contrast to conventional batch-effect removal approaches, the  
127 centralisation step is applied to datasets where the observations are biological replicates  
128 derived under the same experimental conditions. Hence, CSE removes treatment-induced or  
129 tissue-specific effects, and technical bias introduced by variability between experiments. Here,  
130 GCN approaches based on either Pearson or partial correlation using CSE were compared to  
131 corresponding approaches in the absence of the CSE step. The biological validation was  
132 conducted by categorizing a subset of genes encoding for plant mitochondrial proteins with  
133 respect to expression patterns, functional proximity, and functional categories. CSE combined  
134 with GCN (utilizing Pearson correlation) provided the optimum balance of ease of data  
135 processing vs. the utility of the output. Consequently, a mitochondrial network based on CSE  
136 Pearson correlation was selected for further downstream applications of the method.

137

## 138 **Results**

139 To gain clarity, this results section has been divided in 3 parts: Methodology, Validation and  
140 Application.

141

## 142 **Methodology**

### 143 *Definition of the problem*

144 We consider a problem where we have gene expression data from a large number of diverse  
145 experiments, e.g. experiments from different tissues, conditions and developmental stages.  
146 The objective is to predict the edges of an undirected graph with  $n$  nodes (i.e. genes), where  
147 an edge represents the most pronounced co-expression between a pair of genes. Often, the  
148 level of co-expression between genes will be context-dependent, e.g. tissue, growth condition  
149 or developmental stage. Here we are primarily interested in detecting the core network, i.e. to  
150 estimate the co-expression between genes that are prominent in the majority of the considered  
151 sub-experiments. A sub-experiment is defined as a set of assays derived under “identical  
152 settings”, i.e. the assays within the sub-experiment can be treated as biological replicates. We  
153 thus propose a pre-processing step (CSE) that enables prediction of the core network.

154

### 155 *Centralisation within sub-experiments*

156 We consider normalized gene-expression data from  $s$  sub-experiments i.e.

$$157 \{x_{ijk}\}, i = 1, \dots, n, j = 1, \dots, s, k = 1, \dots, r_j,$$

158

159 where  $x_{ijk}$  denotes the normalized gene-expression for gene  $i$  observed on the  $k^{\text{th}}$  biological  
160 replicate in sub-experiment  $j$ . CSE is a simple pre-processing step whereby mean-  
161 centralization within sub-experiments is applied to each gene separately, i.e. the CSE-  
162 processed expressions are obtained as:

$$163 x_{ijk}^{CSE} = x_{ijk} - \bar{x}_{ij},$$

164 where  $\bar{x}_{ij}$  denote the mean-expression of gene  $i$  in the  $j^{\text{th}}$  sub-experiment,  $i = 1, \dots, n, j = 1, \dots, s,$   
165  $k = 1, \dots, r_j$ .

166 It should be noted that the mean value of the centralised data within a sub-experiment will  
167 always be zero. The idea behind CSE is to avoid pronounced correlations driven by differences

168 between the sub-experiments. For example, a stress may induce gene expression in genes  
169 that are expressed in “independent” pathways resulting in false positive and false negative  
170 predictions (Supp. Fig. 1).

171

### 172 *Construction of Gene Co-expression Networks*

173 GCNs can be constructed in various way, but we focused on some commonly used  
174 conventional approaches to assess the effect of CSE application. The GCNs were constructed  
175 in a three-step procedure: (i) the pre-processed dataset was either centralised using CSE (C)  
176 or not centralised (NC), (ii) pairwise correlations were calculated using either Pearson  
177 correlation (PeC) or partial correlation (PaC), and (iii) the *sign matrix* (i.e. an adjacency matrix  
178 whose entries are either 1, 0 or -1) was constructed by controlling the fraction  $\omega$  of edges at a  
179 desired level, i.e. controlling the sparsity at level  $\omega$ . The network was defined by the output of  
180 the precision matrix; where a “one” represents an edge corresponding to a level of co-  
181 expression between genes that satisfies a given cut-off. In this study, four different principal  
182 networks were evaluated: combining CSE and Pearson correlation (CPeC), CSE and partial  
183 correlation (CPaC), and Pearson and partial correlation applied in the absence of CSE  
184 (NCPeC and NCPaC, respectively). The sparsity of all GCNs was controlled at  $\omega=0.005$  and  
185 the Walktrap community detection algorithm (Pons and Latapy, 2005) was used to identify  
186 communities in the predicted GCN based on Pearson correlation, see Method for further  
187 details.

188 It should be noted that the objective here was not to predict all edges in the core network, but  
189 to predict the most pronounced edges, which justifies the use of an arbitrary chosen threshold.  
190 Moreover, having the same sparsity in all predicted networks simplified the evaluation as  
191 described below.

192 Applying the conceptual reasoning outlined above on a network using simulated data  
193 demonstrated that CPaC removes non-causal edges arising from the influence of other genes  
194 and non-causal edges caused by external factors (Supp. Fig. 1). Similar results were obtained  
195 for CPeC, with the exception that a few false, but relatively weak, edges appeared. The

196 network utilising non-centralised data and Pearson correlation, arguably a fairly standard  
197 approach, resulted in dense networks with several false positives. Due to computational  
198 constraints, partial correlation approaches may not be suitable for constructing GCNs when  
199 the number of genes is much larger than the number of experiments, see Discussion.

200

### 201 *Evaluation of Gene Co-expression Networks*

202 We consider a core network  $C$ , with  $n$  nodes and  $k$  edges, where the edges corresponds to  
203 the fraction  $\omega$  of the strongest co-expression correlation. A sub-network  $A \subset C$ , with  $n_A$  nodes  
204 and  $k_A$  edges is said to be pronounced if  $k_A$  is larger than the expected number of edges in a  
205 randomly selected sub-network with  $n_A$  nodes, i.e.

$$206 \quad k_A > \omega \binom{n_A}{2}.$$

207

208 The network  $C$  is commonly unknown, but it may still be possible to identify several pronounced  
209 sub-networks, e.g. by considering physical or functional proximity, see Methods - Preparing  
210 elements of the mitochondrial working model (iii-iv).

211 We propose that the relative performance of predicted GCNs, all with the same sparsity  $\omega$ , can  
212 be evaluated based on the observed number of edges within pronounced sub-networks. In  
213 short, we argue that the more observed edges (the lower p-values) within pronounced sub-  
214 networks, the better the predicted networks are, see Methods for further details. With that being  
215 said, there is a risk to overestimate the number of edges within the pronounced sub-networks  
216 resulting in an incorrect ranking of the considered networks, however, this risk decreases as  
217 the number of pronounced sub-networks is increased.

218

### 219 **Validation**

220 For this study, we chose the plant mitochondrion as a focal point for 3 main reasons: (i)  
221 assessing the biological relevance of our findings became much easier due to our pre-existing  
222 knowledge on the plant mitochondrial metabolism, (ii) the number of genes to work with is low



223 (ca. 1000 nuclear genes encoding for mitochondrial-targeted proteins), hence easing the  
224 application of partial correlation methods, and (iii) the interest in mitochondrial biology is  
225 undoubtable as this organelle is recognised as a central energetic, signalling, and stress  
226 response hub in (almost) all eukaryotic cells.

227

### 228 *The effect of tissue type on Gene Co-Expression Networks*

229 Visualisation of the four GCNs generated using Cytoscape (Organic layout; Shannon et al.,  
230 2003) revealed networks that shared strong similarities in structure depending on whether CSE  
231 was applied or not (Figure 2; Supplemental Table 2). Those networks based on non-  
232 centralised data displayed two distinct primary clusters of nodes (Figure 2A and B), while those  
233 based on centralised data were more integrated (Figure 2C and D). To uncover the source of  
234 these distinct clusters in the non-centralised data, we returned to the original data from the  
235 AtGenExpress expression atlas, and defined each gene as presenting dominant expression in  
236 either below-ground tissues (e.g. roots) or above-ground photosynthetic tissues (e.g. shoots  
237 and leaves), see Methods for details. Using these definitions, nodes (genes) from the  
238 Cytoscape-generated networks were coloured based on their classification as either below-  
239 ground dominant (brown), above-ground dominant (green) or dominance in neither tissue  
240 (yellow) (Figure 2). This rapidly demonstrated the strong influence tissue-of-origin has over the  
241 resulting co-expression networks, and the efficacy of CSE in resolving this. Notably, in addition  
242 to the increased integration of genes with different tissue-dominances, the number of nodes  
243 present (thus, the number of nodes with at least one edge to another node) in the four networks  
244 was significantly larger following CSE. Furthermore, the distribution of genes with tissue-  
245 dominance established an increased inclusion of genes with no tissue dominance (Neither),  
246 which brought these networks closer to the native distribution of tissue of origin dominance  
247 observed in the total set. This suggests that by removing external biases, CSE of data could  
248 introduce a wider cross-section of genes into a GCN and thus reveals novel interactions.

249

### 250 *Assessing interactions based on functional proximity*

251 Our first approach at challenging the four different co-expression networks was to examine the  
252 resulting distribution of edges upon a small isolated subset of the mitochondrial network,  
253 encoding components of the mitochondrial electron transport chain (mETC). The mETC is  
254 central to the bioenergetic function of mitochondria and the array of genes that comprise its  
255 five complexes have been demonstrated to be expressed at relatively stable levels in a variety  
256 of tissue types and developmental stages (Lee et al., 2011). A comparison between the mETC  
257 set isolated from the four networks revealed a significantly higher number of edges (derived  
258 from connections within and between the five complexes) in the networks based on centralised  
259 data, while the influence of Partial correlation vs. Pearson correlation was comparatively small  
260 (Figure 3A). As the same sparsity is applied to all four approaches, the total number of edges  
261 in the entire network is held consistent between them; thus, the enrichment of edges within the  
262 mETC observed here represents a valuable indication of putative biological interaction. Our  
263 next step was to assess the distribution of edges within a single complex of the mETC. The  
264 NADH dehydrogenase, commonly known as Complex I, is composed of three domains: the  
265 peripheral arm domain (PAD), the membrane arm domain (MAD), and the carbonic anhydrase  
266 domain (CAD) (Klodmann et al. 2010). Each domain in turn is composed of an assembly of  
267 proteins that carry out highly specialised functions, and thus proved ideal to assess the  
268 relevance of the distribution of edges between the four different approaches (Methods; Figure  
269 3B). Similar to the distribution of edges for the entire mETC, there were far more edges  
270 between the nodes of Complex I in centralised than in non-centralised data, while the  
271 difference in the number of edges between networks based on Pearson or Partial correlation  
272 is negligible (Supplemental Table 3). In almost all cases, when comparing the number of edges  
273 expected to occur by chance between the genes of the three domains with the actual observed  
274 edges, this enrichment was found to be highly significant (Figure 3B). When this examination  
275 was expanded to look at the distribution of edges within and between all five complexes of the  
276 mETC, a similar enrichment of significant interactions was observed in the centralised data,  
277 but not in the non-centralised data (Figure 3C). Interestingly, when the distribution of edges  
278 between individual complexes and either (i) pooled complexes of the mETC, or (ii) the rest of

279 mitochondrial set (total mitochondrial set, excluding the mETC), the networks based on non-  
280 centralised data showed relatively poor correlations with the pooled mETC and even weaker  
281 connections with the non-mETC components (Figure 3D). In contrast, the centralised data  
282 showed significantly ( $P < 0.001$ ) strong connections between the individual complexes and the  
283 pooled mETC, with weaker connections to the non-mETC components. One important  
284 exception to this was the significant ( $P < 0.001$  in CPaC, and  $P < 0.01$  in CPeC) connection  
285 observed between Complex II and the non-mETC components. Notably, Complex II (also  
286 called Succinate Dehydrogenase) lies at the confluence of two essential bioenergetic functions  
287 of the mitochondrion: the mETC and the TCA cycle. As such, it is particularly notable that the  
288 centralised data identified Complex II as having significant interaction with non-mETC  
289 components. Examination of the composition of edges between Complex II and these non-  
290 mETC genes revealed that they were indeed significantly ( $P < 0.0001$ ) enriched in components  
291 of the TCA cycle. Taken together, these observations strongly support that CSE of data prior  
292 to correlation analysis can reveal gene-to-gene interactions indicative of highly valuable  
293 biological relationships such as association to shared protein domains or consecutive enzymes  
294 in a metabolic pathway.

295

296 *Assessing interactions based on connectivity within and between mitochondrial functional*  
297 *categories.*

298 Using the newly updated functional annotations established for the MapMan platform (MapMan  
299 X4 Release 1.0, 2018; Usadel et al., 2009), each gene of the mitochondrial set was assigned  
300 to one of 29 functional categories. By grouping genes belonging to the same functional  
301 categories, we were able to measure the number of edges between genes *within* a functional  
302 category, versus those between *different* but interrelated functional categories (Figure 4). In  
303 brief, when CSE had been carried out (Figure 4C and D), the number of significant edges  
304 between genes within the same category is much higher (ca. doubled) than is observed when  
305 the data is non-centralised (Figure 4A and B). Additionally, in the two centralised datasets, the  
306 number of significant edges between *different* functional categories also increases, when

307 compared to their non-centralised counterparts. These inter-category edges were often highly  
308 biologically relevant: for example a significant ( $P < 0.0001$ ) edge was observed between  
309 *nucleotide metabolism* and *protein biosynthesis* in each of the four methodologies (Figure 4A-  
310 D), which is hardly surprising given their canonic interconnectivity. In contrast, some  
311 connections were only observed in the case of the centralised datasets (Figure 4A-B), such as  
312 the significant ( $P < 0.0001$ ) edges between *cellular respiration* and *carbohydrate and lipid*  
313 *metabolism*, as well as the connection between *protein biosynthesis* and *protein translocation*.  
314 For these processes to operate efficiently, a high level of coordination in the regulation of the  
315 genes involved is required, which supports these additional inter-category edges. In summary,  
316 the known biological pathways strongly corroborate the input from the centralized co-  
317 expression data generated with our mitochondrial dataset and undoubtedly strengthen its  
318 consideration for future analyses. Following these validation steps, the negligible difference in  
319 results between centralised Pearson correlation and partial correlation, contrasted with  
320 computational demands associated with the latter, led us to progress with the subsequent  
321 application using centralised Pearson correlation (CPeC).

322

### 323 **Application**

#### 324 *Using the network to predict the function of an uncharacterised mitochondrial gene*

325 The functional annotations applied to the genes comprising the mitochondrial network  
326 (introduced above) encompassed a subset of mitochondrial genes that at the time of the  
327 publication of the MapMan hierarchical set of functional categories (BINs; MapMan X4 Release  
328 1.0, 2018), encoded proteins with no assigned functions (NAFs; Functional Category 35). This  
329 provided an ideal target group that we could systematically interrogate, in a “guilt by  
330 association manner”, to determine if their relationship to other genes of known functions could  
331 support their putative function. A subsequent mitochondrial network was established, which  
332 comprised 111 NAF genes and 257 mitochondrial genes encoding proteins with known  
333 functions that had at least one edge to a NAF gene (Figure 5A; Supplemental Table 4). The  
334 NAF genes were then arranged in descending order based on those with the greatest number

335 of edges to genes with known functions. We then selected the top 5 NAF genes and identified  
336 the genes they interacted with. Next, the distribution of their associated functional annotations  
337 was determined and assessed to see if they were enriched in a particular function (Figure 5B).  
338  
339 The top 5 NAF genes displayed significant over-representations with a range of different  
340 functional categories. The NAF with the greatest number of connections with genes of known  
341 function, AT4G26780, had a significant enrichment of edges with (i) protein biosynthesis -  
342 organelle translation machineries ( $P < 0.05$ ), (ii) protein translocation - TOM translocation and  
343 TIM insertion systems ( $P < 0.05$ ), and (iii) external stimuli response - heat-shock-responsive  
344 protein ( $P < 0.05$ ). Interestingly, this protein has been proposed to encode Mge2, which is one  
345 of two mitochondrial GrpE proteins in Arabidopsis. The remaining homologue, Mge1 serves  
346 as a co-chaperone alongside Hsp70, which together form a vital part of the presequence-  
347 assisted motor (PAM) complex that aids in the transport of precursor proteins through the  
348 TIM17:23 translocase (Hu et al., 2012; Ghifari et al., 2018). While Mge1 appears to have more  
349 constitutive house-keeping duties, Hu et al., (2012) demonstrated that Mge2 was specifically  
350 induced by heat and suggested that it could be required for mitochondrial protein import and  
351 folding during periods of heat stress, a hypothesis that appears to be supported by our GCN  
352 predictions. The second gene interrogated (AT1G02150), had a significant enrichment of  
353 edges with (i) photosynthesis functions ( $P < 0.01$ ), (ii) amino acid metabolism ( $P < 0.05$ ), and (iii)  
354 protein biosynthesis - aminoacyl-tRNA synthetase ( $P < 0.001$ ). At present, little is known about  
355 this protein, however, the Arabidopsis Information Portal (Araport) 11 classifies it as belonging  
356 to the tetratricopeptide repeat (TPR)-like superfamily (Cheng et al., 2017). TPR domains can  
357 be found in a diverse number of proteins, where they mediate protein-protein interactions;  
358 particularly in the formation of protein complexes. The strong significant ( $P < 0.001$ ) over-  
359 representation with aminoacyl-tRNA synthetase functions (and the weaker, though still  
360 significant over-representation of amino acid metabolism functions) observed here is  
361 particularly interesting, as there is evidence that TPR-containing proteins can act as interacting  
362 mediators and co-chaperones in the formation of aminoacyl-tRNA synthetases (Han et al.,

2007; Kim et al., 2014); suggesting that this protein may have a role in assisting amino acid loading of tRNAs in Arabidopsis. The third gene interrogated (AT1G80270) had a significant enrichment of edges with (i) RNA processing ( $P < 0.001$ ) and (ii) protein biosynthesis - organelle translation machineries ( $P < 0.05$ ). Assessing the available literature, this protein has been reported as belonging to the pentatricopeptide (PPR) superfamily (Doniwa et al., 2010), which are predominately mitochondrial or plastid targeted proteins and have been demonstrated to have a diverse array of roles associated with RNA metabolism, such as RNA editing, splicing, stability and translation (Barkan and Small, 2014). AT1G80270, known as PPR596, has been demonstrated to be involved in the C-to-U editing efficiency of ribosomal protein S3 (RPS3; AtMg00090), which is noteworthy as in our study, PPR596 was also significantly enriched in connections with organelle translation machinery functions (Doniwa et al., 2010). Regarding AT3G47520, despite the surprising lack of a proper annotation by Mapman, this gene had been characterized and encodes an isoform of the mitochondrial dehydrogenase (mMDH2; Tomaz et al., 2010; Lindén et al., 2016). Although no functional categories were enriched, the big proportion taken by the categories redox homeostasis, cellular respiration and protein biosynthesis strongly supports the physiological role of mMDH2. Finally, the protein encoded by AT4G35850 had a significant ( $p < 0.001$ ) enrichment of edges with protein biosynthesis - organelle translation machineries (large and small mitoribosome subunit) functions. Very little is known about this protein, but it has been classified as belonging to the PPR superfamily by Araport11, and could thus have a similar role to that of PPR596; as an editing factor associated with the correct processing of transcripts encoding mitoribosomal subunits, or be associated with ribosomes in other ways described in the literature; such as maintaining the stability of assembled mito-ribosomes following translation (Schmitz-Linneweber and Small, 2008); or promoting translational initiation by selectively recruiting mitoribosomes to the start codon of their target transcripts (Manavski et al., 2012; Haïli et al., 2016). Taken together, these findings suggest that guilt by association-style analysis of networks founded on data subjected to CSE offers an attractive first step in the process of characterising genes where little is known about them.

391

392 *Synergy of centralisation approaches in the analysis of plant stress*

393 In the field of transcriptomics, the application of conventional co-expression networks has  
394 proven a highly powerful approach in characterising stress responses in a diversity of  
395 organisms. In this study, we have demonstrated that CSE of data prior to correlation analysis  
396 effectively identifies the innate relationship between genes, and thus delineates a “core gene-  
397 network”. However, as previously mentioned, a caveat of this approach is that it is predicated  
398 on the suppression of extraneous effects, such as stress, tissue, treatment, or genotype from  
399 a given dataset, which therefore prevents us from interrogating the impact of these outside  
400 influences on the dynamics of the co-expression network generated. On the other hand, quite  
401 often researchers must adjust different parameters (cut-offs, thresholds, etc.) to introduce  
402 enough genes to reposition the stress-responsive network in a wider biological context and  
403 gain understanding. Here we propose an alternative method, with a powerful reference tool  
404 that can augment conventional co-expression analyses. By clustering the CSE data of the  
405 entire AtGenExpress Expression Atlas using a Walktrap community detection algorithm (Pons  
406 and Latapy, 2005), we generated a hierarchical CSE Reference Community composed of 27  
407 communities (Figure 6A). This additional filter based on co-expression metadata could then be  
408 layered onto a conventional co-expression network (based on any treatment, developmental  
409 stage, or tissue type selected by the researcher), and thus provide a more detailed and  
410 nuanced view of the innate relationships between the genes, when  
411 stress/treatment/tissue/genotype effects have been nullified.

412

413 To illustrate this, we identified a subset of 65 mitochondrial genes that are highly co-expressed  
414 in shoot tissues in response to the following four stress treatments: Heat, Cold, Drought, and  
415 Salt, using non-CSE pre-processed data (Kilian et al., 2007). As shown in Figure 6B,  
416 conventional co-expression analysis (here based on Pearson correlation coefficient) provides  
417 an initial network, which illustrates the influence of stress on the relationship between specific  
418 stress-responsive genes. When the expression network of the core stress responsive genes

419 was cross-referenced with the CSE Reference Community, the resulting subdivisions revealed  
420 unique insights into the functional composition and basal connectivity of this network (Figure  
421 6C). For example, most of genes grouped in Community 1 were associated with  
422 photorespiration and thiamine biosynthesis, two metabolic pathways often associated with  
423 stress response in plants, and notably in photosynthetic parts (Supplemental Figure 2; Hodges  
424 et al., 2016; Rapala-Kozik et al. 2012). Furthermore, Community 3 was overwhelmingly  
425 composed of functions associated with translation (e.g. ribosomal protein L36), import (e.g.  
426 TOM6, TIM9, and the TIM-family protein AT1G18320), and assembly (e.g. HSP60-3A, HSP6,  
427 Hsp89.1, CR88, and MGE2). Interestingly, a number of the genes in this shoot core stress set  
428 were also present in a corresponding network prepared from root data (denoted with a black  
429 outline in Figure 6B). Of these shared genes, 2/3<sup>rd</sup> are found in Community 3, which again  
430 emphasises their importance. Therefore, we propose that viewing traditional co-expression  
431 networks through a prism of a CSE Reference Community can rapidly reveal hidden degrees  
432 of connectivity between genes and could have far-reaching applications in the field of  
433 transcriptomics, regardless of organisms, treatments or even pathologies.

434

## 435 **Discussion**

436 In light of the burgeoning output of next generation sequencing projects performed on any  
437 species, under different developmental or clinical conditions, the statistical power and  
438 complexity of these networks will undoubtedly increase, while their biological relevance will be  
439 fiercely challenged. Therefore, it is essential that current methodologies be refined to keep  
440 apace of this progress and utilise these resources to generate more accurate and informative  
441 gene networks to answer hypothesis-driven questions. With the present study, we proposed  
442 an alternative method to conventional batch corrections and demonstrated that the  
443 implementation of CSE (performed simultaneously per gene and per sub-experiment) and  
444 used in isolation or coupled to traditional correlation approaches, can provide additional  
445 biological relevance to conventional co-expression networks.



446 Arguably, there is not a unique defining co-expression network, since the degree of co-  
447 expression clearly depends on the context considered, e.g. tissue, growth condition or  
448 developmental stage. Nonetheless, we believe there is utility in generating a core network,  
449 where the edges corresponds to essential interactions and pathways that are commonly  
450 present. Furthermore, the predicted number of edges in a GCN is determined by user defined  
451 inclusion rules, e.g. an edge is predicted if the correlation is significant and/or has a value  
452 greater than a given threshold. From a biological point of view, these inclusion criteria are  
453 problematic since the number of edges depends on the number of samples (the more samples,  
454 the lower the p-values and thus the more edges) and which method is used to quantify the co-  
455 expression. For example, GCNs using CSE will on average estimate less extreme correlations  
456 than GCNs not using CSE, although they may share several edges (see Supp. Fig. 3). We  
457 argue that a sensible alternative approach is to control the sparsity of the network and to  
458 consider the predicted edges simply as the most pronounced co-expressions.

459  
460 The predicted core network depends on the coverage of included samples, which necessitates  
461 extensive sampling; covering different tissue types, developmental stages, and stresses. A  
462 challenge of sampling broadly is the difficulty of combining samples from contextually different  
463 experiments, with core gene co-expression being obscured by treatment-associated co-  
464 expression. One solution would be to split the experimental data into subsets where each  
465 subset consists of data from similar experiments, and predict a separate network for each  
466 dataset, and finally estimate the core network with a consensus network. However, this  
467 approach suffers from some shortcomings; it may be difficult to define the subsets, there may  
468 be relatively few samples within the subsets and it is unclear how to derive the consensus  
469 network. The proposed pre-processing method CSE, which can be combined with any GCN  
470 method, defines the subsets (i.e. the sub-experiments) conservatively and mechanically,  
471 where each sub-experiment consists of biological replicates, and removes all treatment effects  
472 including batch effects, allowing for a direct estimation of the core network based on all  
473 available samples. A drawback with the CSE approach is that it will reduce the signal-to-noise

474 ratio. For the considered Arabidopsis data, with 887 samples, this seems to be minor problem,  
475 but for relative small data sets it remains an open question whether this could become a hurdle.

476  
477 Evaluation and validation of GCNs is a challenge, since we have limited information on the  
478 “true” relationship that exists between genes. We commonly have experimentally confirmed  
479 protein-protein interactions and for some subsets of genes it may be reasonable to assume a  
480 relatively high degree of co-expression. We usually lack information on truly non-existing  
481 edges. In fact, from a theoretical point of view, we may argue that all pairs of genes are co-  
482 expressed to some extent. We propose that the validation should be based on pronounced  
483 sub-networks for which we expect to observe more co-expression (i.e. more edges) than  
484 expected by chance. This approach allows us to compare different GCNs, all with the same  
485 sparsity, and to easily access statistical significance. It should be stressed that the result of  
486 the validation depends on the sparsity level and which pronounced sub-networks are used in  
487 this validation. In particular, if the number of genes is high it may be recommended to construct  
488 a relatively dense network and to include several pronounced sub-networks to ensure high  
489 power of the tests.

490  
491 Here, we used a plant mitochondrial case study, where a series of validation steps established  
492 the strength of GCNs built upon data that had been pre-processed with CSE. Plant  
493 mitochondria are highly adaptive organelles that can tailor their protein complement to  
494 undertake a multitude of specialised roles. Nonetheless, there are a set of canonical functions  
495 and associated pathways that are maintained/operated in most tissues, growth conditions,  
496 developmental stage, etc. even though such pathways (e.g. respiration, TCA cycle, amino  
497 acids catabolism) can of course be differentially regulated to modulate their intensity i.e.  
498 regulate the metabolic flux through them. This means that the genes encoding proteins  
499 involved in those pathways are functionally correlated even though their respective expression  
500 profiles may diverge slightly to satisfy a certain metabolic modularity. Our results show that  
501 CSE-based GCNs had significantly more edges within the majority of the considered

502 pronounced sub-networks (i.e. the mETC-complex and its sub-complexes and networks  
503 defined by annotation) than GCNs not using CSE (Fig. 3, Fig. 4); which demonstrates that the  
504 CSE-based GCNs are efficient at predicting those canonical functions and associated  
505 pathways, also referred to as the core network. Furthermore, we showed that CSE, in  
506 conjunction with conventional Pearson correlation can be used to fine-tune the prediction of  
507 the function for uncharacterised genes (Fig. 5); while a combination with non-centralised data  
508 can augment conventional stress analyses with the innate connections underpinning the  
509 dynamic system examined (Fig. 6). Indeed, the trade-off of a CSE approach is that the  
510 biological precision gained by strengthening a core gene-network results in a loss of  
511 information from any stress/treatment/genotype components of the dataset. Despite this, if the  
512 focus of a given study is centred on determining the network articulated around specific stress-  
513 responsive genes, one can apply a CSE Reference Community onto a conventional “stress”  
514 co-expression network. This augments the network with extended biological insights, and  
515 provides the user with a resource to better interrogate the biological context of the data. Such  
516 context is often hindered by the use of stringent cut-offs and thresholds throughout the gene  
517 network establishment. Finally, although based on a plant mitochondrial set to simplify the  
518 biological validation of our method, the present study provides an alternative method for  
519 interrogating the biological relevance of any gene co-expression network, regardless of  
520 organism or biological context.

521

## 522 **Methods**

### 523 *Dataset generation*

524 To obtain the widest coverage possible of a plant transcriptome, the AtGenExpress expression  
525 atlas was utilised. This resource is the result of a multinational consortium that aimed to define  
526 an exhaustive transcriptome, covering (i) Arabidopsis developmental stages and tissues types  
527 (Schmid et al., 2005), (ii) biotic and abiotic stress treatments (Killian et al., 2007), and (iii)  
528 hormone and chemical treatments (Goda et al., 2008). These studies used Affymetrix ATH1  
529 arrays and, where possible, maintained consistent experimental practices between samples

530 so as to optimise comparability. For this study, 887 CEL files from the AtGenExpress set  
531 (spanning over 370 unique experimental conditions) were quantile normalised together  
532 resulting in the pre-processed dataset. For each unique condition (henceforth referred to as  
533 sub-experiment) there were two or three samples, which can be regarded as biological  
534 replicates observed under similar conditions, where the conditions were defined with respect  
535 to tissue developmental stage and treatment (e.g. a different type of stress). See Supplemental  
536 Table 1 ([https://www.upsc.se/researchers/4638-olivier-keech-stress-induced-senescence-  
537 and-its-subsequent-metabolic-regulations.html#resources](https://www.upsc.se/researchers/4638-olivier-keech-stress-induced-senescence-and-its-subsequent-metabolic-regulations.html#resources)).

538

### 539 *Construction of Gene Co-expression Networks*

540 All analysis, if nothing else is said, was conducted with the statistical programming language  
541 R version (R 3.5.1) (R Core Team, 2018). The R-code used to construct the GCNs described  
542 below are found in our GitHub repository (Kellgren and Rydén, 2019;  
543 <https://github.com/Tezinha/Gene-Co-expression-Network>).

544

545 The precision matrices were derived by controlling the fraction of edges in the off-diagonal  
546 precision matrix at a user defined level  $\omega$ . The elements of the precision matrix were derived  
547 from a correlation matrix where the elements were set to “one” if the absolute value of the  
548 correlations were larger than a cut-off  $\alpha$ , and “zero” otherwise. The threshold  $\alpha$  was obtained  
549 by an iterative procedure controlling the sparsity at the level  $\omega=0.005$ .

550 The above approach was used for all analyses with the exception of exception of the analysis  
551 resulting in the predicted communities presented in Figure 6 where an alternative bootstrap  
552 approach was used. Here samples were randomly chosen with replacement, followed by  
553 calculation of the precision matrix as described above. This procedure was repeated 50 times  
554 and the resulting precision matrices were combined, generating a matrix with values ranging  
555 from 0 to 50. The elements of the precision matrix were derived from the aggregated matrix,

556 where the elements were set to “one” if the values exceeded a cut-off  $\beta$ , and “zero” otherwise.  
557 Here  $\beta$  was chosen to control the sparsity  $\omega$  at 0.005.  
558 Due to computational reasons partial correlation approaches are often carried out on subsets  
559 of genes, rather than the whole genome of an organism. An example of this was detailed in  
560 Ma et al., (2007), which used a modified GCN approach to carry out partial correlation analysis  
561 on batches of  $\sim 2000$  genes at a time. Aided by iterative random samplings of genes, this study  
562 increased their coverage to that of the Affymetrix ATH1 array; resulting in a network composed  
563 of 18 625 interactions (edges) and 6760 genes (nodes) (Ma et al., 2007). Ren et al., (2015)  
564 expanded on this and proposed an algorithm for constructing GCN with high-dimensional data  
565 by implementing asymptotically normal estimation of large GCN, and in doing so, made it  
566 realistic to perform GCN at a whole-genome scale (Wang et al., 2016). Unsurprisingly, this  
567 approach is enormously computationally taxing, which can prove prohibitive to researchers  
568 lacking dedicated servers and advanced computer processing power.

569

#### 570 *Evaluation of Gene Co-expression Networks*

571 For any sub-network  $A$ , with  $n_A$  nodes and  $K_A$  observed edges, of the predicted core network  
572  $C$ , with  $n$  nodes and sparsity  $\omega$ , it possible to test if the sub-network is pronounced (the hull  
573 hypothesis) versus that the sub-network is not pronounced (the null hypothesis). Under the  
574 null hypothesis  $K_A$  is binomial distributed, i.e.

575 
$$K_A \square Bin\left(\binom{n_A}{2}, \omega\right),$$

576 and a binomial test can be used to derive a p-value. Here the R-function “binom.test” (R 3.5.1)  
577 was used to derive the p-values.

578 It should be stressed that the p-values will depend on the network’s sparsity as well as the size  
579 of the sub-network, the larger the pronounced sub-networks are the lower p-values will be  
580 expected. Hence, all tough not necessary, having the same sparsity in all networks simplifies  
581 the evaluation. Moreover, the more pronounced sub-networks that can be correctly identified  
582 the more reliable the evaluation will be.

583

584 *Preparing elements of the mitochondrial working model*

585 *(i) Defining the mitochondrial gene list*

586 The manually curated list of genes encoding proteins targeted to the mitochondria from  
587 Chrobok et al., (2016) was used as a basis for a mitochondrial case-study. Matching this list  
588 with the AtGenExpress Expression Atlas resulted in a list of 984 mitochondrial genes, which  
589 were used for downstream analysis. The samples were taken from different tissues: flower,  
590 root, shoot, seedling, leaf, pollen and silique. Mitochondrial genes were categorised with  
591 respect to expression patterns, functional proximity and functional categories for downstream  
592 validation (Supplemental Table 1).

593

594 *(ii) Defining below-ground and above-ground dominant genes*

595 The mitochondrial genes were classified in two categories with respect to their expression  
596 patterns in below-ground tissues (e.g. root) and above-ground tissues (e.g. shoot and leaf).  
597 For each gene  $i$ , the difference between the mean expressions in below-ground tissues,  $\bar{x}_{Bi}$   
598 and above-ground tissues,  $\bar{x}_{Ai}$  was calculated, i.e.  $\Delta_i = \bar{x}_{Bi} - \bar{x}_{Ai}$ . Genes with a difference larger  
599 than one standard deviation, i.e.  $\Delta_i > s_{\Delta}$ , were classified as *below-ground dominant genes*,  
600 while those with a difference smaller than one standard deviation, i.e.  $\Delta_i < -s_{\Delta}$ , were classified  
601 as *above-ground dominant genes*. The estimated standard deviation was based on all the  $\Delta$ -  
602 values of genes.

603

604 *(iii) Defining components of Complex I of the mitochondrial electron transport chain*

605 Complex I of the mitochondrial electron transport chain (mETC) was an ideal model to test the  
606 effect of functional proximity of the resulting networks, as the identity and molecular  
607 arrangement of these constituents have been thoroughly characterised in Arabidopsis using  
608 proteomic approaches (Klodmann and Braun., 2010; Peters et al., 2013).

609

610 *(iv) MapMan annotations*

611 Using the newly updated functional annotations established for the MapMan platform (MapMan  
612 X4 Release 1.0, 2018; Usadel et al., 2009), each gene of the mitochondrial set was assigned  
613 to one of 29 functional categories.

614

#### 615 *Preparing a Reference Community Set*

616 The *Walktrap community detection algorithm* runs short random walks and merges separate  
617 communities in a bottom-up manner to produce clusters, and was applied to the derived  
618 networks to identify *gene communities*, i.e. sets of genes with a high degree of predicted intra-  
619 gene-gene interactions. The function “walktrap.community” with default settings in the R  
620 package igraph (Csárdi and Nepusz, 2006) was used to conduct the analyses. Here, gene  
621 communities were predicted based on a network obtained using centralized data from all  
622 experiments, Pearson correlation and a precision matrix derived using the absolute value of  
623 the correlations. The result was a CSE Reference Community composed of 27 clusters.

624

#### 625 *Combining results obtained using centralized and non-centralized data*

626 We claim that gene communities should be estimated based on networks derived using all the  
627 available centralized data, while networks based on non-centralized data describe how genes  
628 are affected by an external factor, e.g. stress induced by heat, cold, salt or drought. Combining  
629 the two type of networks allowed us to study how gene communities were affected by stress.  
630 The combined analysis was made as follows. First the communities were predicted as  
631 described above, resulting in the *community network*. Secondly, for each of the considered  
632 stresses, samples exposed to the stress were selected (heat n=16, cold n=24, salt n=24, and  
633 drought n=28). A precision matrix was calculated using non-centralized data, Pearson  
634 correlation, and non-bootstrap approach with a cut-off=0.82. The sum of the four stress-related  
635 precision matrices was calculated and edges with an aggregated score equal to 4 were set to  
636 “one” in the combined precision matrix (i.e. the *stress network*) and regarded as gene-gene  
637 interaction caused by a general stress response.

638 The community and stress networks were combined. Communities enriched with respect to  
639 general stress were identified similarly as described above. An enrichment analysis with  
640 respect to functional categories was made for each of the enriched communities.

641

## 642 **Declarations**

643 *Ethics approval and consent to participate*

644 Not applicable

645

646 *Consent for publication*

647 Not applicable

648

649 *Availability of data and material*

650 - The datasets analysed during the current study are available under the AtGenExpress  
651 expression atlas, which is the result of a multinational consortium that aimed to define  
652 an exhaustive transcriptome, covering i) Arabidopsis developmental stages and tissues  
653 types (Schmid et al., 2005), ii) biotic and abiotic stress treatments (Killian et al., 2007),  
654 and iii) hormone and chemical treatments (Goda et al., 2008).

655 - All data generated during this study are included in this published article and its  
656 supplementary information files.

657

658 *Competing interests*

659 The authors declare that they have no competing interests.

660

661 *Funding*

662 This work was financially supported by the Swedish research council "Vetenskapsrådet"  
663 (grant: 621-2014-4688 (OK) and 340-2013-5185 (PR)) as well as by the Kempe Foundations  
664 (Gunnar Öquist Fellowship (OK)) and the Carl Tryggers Stiftelse.

665



666 *Author's contribution*

667 SL, TK and RB performed analyses. SL prepared the figures and drafted the manuscript, PR  
668 and OK conceptualized the project and edited the manuscript. All authors read and approved  
669 the manuscript.

670

## 671 **Figure legends**

672 **Figure 1.** - Figure 1. Schematic illustrating the utility of centralisation when comparing genes  
673 from a diverse background of treatments. (A) Conventional correlation analysis of two genes  
674 (Gene A and Gene B) under control conditions reveals a high positive correlation.  
675 Corresponding correlation analysis of the same two genes in response to a stress treatment  
676 again reveals a high positive correlation. (Bi) When both the control and stress experiments  
677 are combined, conventional correlation analysis results in a low level of correlation (false  
678 negative). (Bii) By carrying out centralisation within sub-experiments (CSE), the mean effect  
679 between replicates is removed, and subsequent conventional correlation analysis now reveals  
680 the “core” high correlation between Gene A and Gene B.

681

682 **Figure 2. Visualisation of the mitochondrial network using four different pre-processing**  
683 **and correlation approaches.** A manually curated mitochondrial gene list was cross-  
684 referenced with the AtGenExpress Expression Atlas spanning different tissues, developmental  
685 stages, and stresses (Schmid et al., 2005, Kilian et al., 2007 and Goda et al., 2008). This data  
686 was either subject to CSE or left unprocessed, prior to correlation analysis using either  
687 Pearson correlation or partial correlation. Each of the four resulting networks was visualised  
688 using Cytoscape. For each network, only nodes with at least one edge to another node were  
689 included. Each node (gene) was coloured based on their classification as either below-ground  
690 dominant (brown), above-ground dominant (green) or dominance in neither tissue (yellow).  
691 The diameter of each node is proportional to the number of edges it has to a neighbouring  
692 node. **(A)** Network of non-CSE Pearson correlation **(B)** Network of non-CSE Partial correlation  
693 **(C)** Network of CSE Pearson correlation **(D)** Network of CSE Partial correlation.

694

695 **Figure 3. Comparative analysis of four different correlation methods in defining**  
696 **interactions based on functional proximity.** The following gene subsets of the mitochondrial  
697 electron transport chain were analysed using non-CSE Pearson correlation (NCPeC), non-  
698 CSE Partial correlation (NCPaC), CSE Pearson correlation (CPeC) and CSE Partial correlation  
699 (CPaC). P values were calculated for the probability associated with the expected vs. observed  
700 number of edges and a colour-grading scheme of the resulting P values applied. **(A)** A Venn  
701 diagram illustrating the overlap of connections between the complexes of the mitochondrial  
702 electron transport chain (mETC), when analysed using the four different correlation methods.  
703 **(B)** The significance of the edges between the three domains of Complex I. **(C)** The  
704 significance of the edges within a given complex or between the different complexes of the  
705 ETC. **(D)** Between the individual complexes of the mETC vs. the unified mETC or the rest of  
706 the mitochondrial set excluding the mETC.

707

708 **Figure 4. Comparative analysis of four different correlation methods based on**  
709 **connectivity between different functional categories in mitochondria.** Using newly  
710 updated MapMan annotations (MapMan X4 Release 1.0, 2018; Usadel et al., 2009), the  
711 mitochondrial set was subdivided into 29 different functional categories. Only functional  
712 categories with at least one significant connection to another category are displayed for each  
713 method. Nodes with a black outline indicate functional categories with significant intra-  
714 connectivity, nodes lacking an outline indicates functional categories that do not have  
715 significant intra-connectivity. **(A)** Non-CSE Pearson correlation (NCPeC), **(B)** Non-CSE Partial  
716 correlation (NCPaC), **(C)** CSE Pearson correlation (CPeC), and **(D)** CSE partial correlation  
717 (CPaC).

718

719 **Figure 5. Identification of candidate functions for mitochondrial proteins with unknown**  
720 **functions.** Pearson correlation was carried out on centralised data spanning the mitochondrial  
721 set, over 370 unique conditions comprising the AtGenExpress Expression Atlas. Out of this

722 list, a sub-population of genes was established which had unknown functional annotations.  
723 This sub-population was then analysed to identify significant interactions with mitochondrial  
724 proteins with known functions, resulting in a suite of 109 mitochondrial proteins with unknown  
725 functions. By annotating the functional categories of the known mitochondrial genes, putative  
726 functional relationships can be assigned to these as yet uncharacterised proteins. **(A)** Network  
727 representation of the interactions between 109 mitochondrial proteins with no annotated  
728 functions and 248 mitochondrial proteins with known functions. **(B)** The five proteins with no  
729 annotated functions displaying the highest number of edges to the mitochondrial set are  
730 shown, with a functional breakdown of the distribution of edges. Significant over-representation  
731 of a given functional category has been marked with the following:  $p < 0.05 = *$ ;  $p < 0.01 = **$ ;  
732  $p < 0.001 = ***$ .

733  
734 **Figure 6. Synthesis of a conventional co-expression network of Arabidopsis shoots**  
735 **common to four stresses with a CSE Reference Community.** **(A)** A CSE Reference  
736 Community was generated utilising the entire AtGenExpress Expression Atlas, using CSE pre-  
737 processed data. This network was divided into 27 primary clusters using a Walktrap community  
738 detection algorithm (Pons and Latapy, 2005). **(B)** A core set of stress-responsive genes was  
739 isolated from the AtGenExpress stress dataset (Kilian et al., 2007) covering Heat, Drought,  
740 Cold and Salt stresses and from this, a network was generated based on Pearson correlation  
741 coefficient with no CSE. **(C)** The initial network of non-centralised core stress response  
742 generated using Pearson correlation coefficient was cross-referenced with the centralised  
743 reference communities; providing deeper insight into the connectivity between genes,  
744 independent of outside influences such as stress or tissue type. The diameter of each node is  
745 proportional to the number of edges it has to a neighbouring node and node colouration  
746 denotes occupation within a given CSE Reference Community.

747  
748 **Supplemental Figure 1. Schematic representations of the conclusions that can be drawn**  
749 **from different correlation analysis approaches of gene expression data.** Five genes were

750 simulated to illustrate a network in the following way; Gene A expression affects Gene B  
751 expression, Gene C expression affects the expression of Gene D and Gene E. The gene's  
752 expression values are regarded as functions of a normally distributed random variable, with a  
753 mean  $\mu=0$ , and a standard deviation  $\sigma=0.5$ . The expression of two of the genes, Gene A and  
754 Gene C are also affected by an external stress treatment, which can be seen as a categorical  
755 variable with two levels. Level one represent no external influences and the variable takes a  
756 value of zero, at level two the gene is influenced by an external factor and the categorical  
757 variable takes the value ten. Gene B expression is affected by the expression of Gene A, so  
758 for each Gene B value a Gene A value multiplied by a constant  $\beta=0.5$  is added. In the same  
759 way, Gene D and Gene E is simulated but with the exception that they are affected by Gene  
760 C. For each of the scenarios 100 expression values were simulated for each gene. To compare  
761 Pearson's correlation against partial correlation the relative correlation, i.e. the most correlated  
762 edge, was set as a baseline and received a correlation value of 1. This was done for each  
763 setup. In the first column the true network is represented and if it is affected by the external  
764 factor. In column 2 to 5 the strength of the relative correlations is represented by the thickness  
765 of the line. **(A)** The network is not affected by any external factor and all four methods have  
766 the correct edges among the top three candidates. There is no difference between non-  
767 centralised and centralised data which is as expected when there is no external factor to  
768 remove with CSE. **(B)** The stress treatment is affecting gene C expression, which has an effect  
769 on the non-centralised networks. Pearson correlation gives a false positive among the top  
770 three candidates, the partial correlation networks gives the correct top three candidates but  
771 the edge between Gene A and B is weak. When we perform CSE both networks give the  
772 correct top three edges. **(C)** In this case, the stress treatment is affecting the expression of  
773 both Gene A and C, which leads to false positives with both methods. By carrying out CSE,  
774 the stress treatment, is removed and both Pearson and partial correlation output the correct  
775 top three edges.  
776

777 **Supplemental Figure 2. Synthesis of a conventional co-expression network of**  
778 **Arabidopsis shoots common to four stresses with a CSE Reference Community Set.** A  
779 core set of stress-responsive genes isolated from non-centralised AtGenExpress stress  
780 dataset (Kilian et al., 2007) covering Heat, Drought, Cold and Salt stresses, cross-referenced  
781 with the CSE Reference Community.

782

783 **Supplemental Figure 3. Correlation between the 985 mitochondrion related genes were**  
784 **estimated using Pearson correlation without centralization (Non-Centralized data) and**  
785 **Pearson correlation with CSE preprocessing (CSE preprocessed data).** For each  
786 approach 484,620 correlations were estimated and the 0.5 % (2423) gene correlations with  
787 the highest absolute value were used to predict edges in the corresponding gene co-  
788 expression network. (A) Estimated density functions over all estimated correlations for non-  
789 centralized data (green) and CSE preprocessed data (red). The black line shows the density  
790 for correlations estimated on simulated noise. (B) The estimated correlations for the two  
791 approaches plotted against each other. Edges shared by both approaches are marked blue  
792 (620 (25.6 %) of the edges were shared), unique edges for the CSE preprocessing network  
793 are marked red, and unique edges for the Non-centralized network are marked green.

794

795 **Supplemental Table 1.** List of 984 genes encoding proteins targeted to the mitochondrion,  
796 referenced with the AtGenExpress Expression Atlas (Schmid et al., 2005, Kilian et al., 2007  
797 and Goda et al., 2008). Note that due to its large size (ca. 250 MB), the file is available at:  
798 [https://www.upsc.se/researchers/4638-olivier-keech-stress-induced-senescence-and-its-](https://www.upsc.se/researchers/4638-olivier-keech-stress-induced-senescence-and-its-subsequent-metabolic-regulations.html#resources)  
799 [subsequent-metabolic-regulations.html#resources](https://www.upsc.se/researchers/4638-olivier-keech-stress-induced-senescence-and-its-subsequent-metabolic-regulations.html#resources)

800

801 **Supplemental Table 2. i)** Non-CSE Pearson correlation; **ii)** Non-CSE Partial correlation; **iii)**  
802 CSE Pearson correlation; **iv)** CSE Partial correlation.

803

804 **Supplemental Table 3. Statistics supporting Figure 3.** Table of the expected, observed,  
805 ratios, and associated P-values. This is carried out for interactions within Complex I, within and  
806 between the 5 Complexes of the mETC, and between the mETC and the rest of the  
807 mitochondrion.

808  
809 **Supplemental Table 4.** List of source and target genes comprising genes encoding proteins  
810 targeted to the mitochondrion, with unknown functions (as per MapMan X4 annotations) and  
811 their edges with known mitochondrial genes.

812  
813 **Supplemental Table 5.** Table of the 27 communities generated using the Walktrap algorithm  
814 on the whole AtGenExpress Set that has been centralised

815

## 816 **References**

817  
818 **Banf M, Rhee SY** (2017) Computational inference of gene regulatory networks: Approaches,  
819 limitations and opportunities. *BBA Gene reg mech* 1860(1):41-52. Epub 2016/09/20.

820  
821 **Barkan A, Small I** (2014) Pentatricopeptide repeat proteins in plants. *Annu Rev Plant Biol* 65:  
822 415–442

823  
824 **Carrera J, Rodrigo G, Jaramillo A, Elena SF** (2009) Reverse-engineering the *Arabidopsis*  
825 *thaliana* transcriptional network under changing environmental conditions. *Genome Biol*  
826 10:R96

827  
828 **Castro DM, de Veaux NR, Miraldi ER, Bonneau R (2019)** Multi-study inference of regulatory  
829 networks for more accurate models of gene regulation. *PLoS comp biol* 15(1):e1006591.

830

- 831 **Chai LE, Loh SK, Low ST, Mohamad MS, Deris S, Zakaria Z** (2014) A review on the  
832 computational approaches for gene regulatory network construction. *Comp biol med.* 48:55-  
833 65. Epub 2014/03/19.
- 834
- 835 **Cheng CY, Krishnakumar V, Chan A, Schobel S, Town CD** (2017) Araport11: a complete  
836 reannotation of the *Arabidopsis thaliana* reference genome. *Plant J* 89:789–804.
- 837
- 838 **Chen C, Grennan K, Badner J, Zhang D, Gershon E, et al.** (2011) Removing Batch Effects  
839 in Analysis of Expression Microarray Data: An Evaluation of Six Batch Adjustment Methods.  
840 *PLoS ONE* 6(2): e17238. doi:10.1371/journal.pone.0017238
- 841
- 842 **Chrobok D, Law SR, Brouwer B, Lindén P, Ziolkowska A, Liebsch D, Narsai R, Szal B,**  
843 **Moritz T, Rouhier N, Whelan J, Gardeström P, Keech O** (2016) Dissecting the metabolic  
844 role of mitochondria during developmental leaf senescence. *Plant Physiol* 172: 2132–2153
- 845
- 846 **Csárdi G, Nepusz T** (2006) The igraph software package for complex network research,  
847 *InterJournal, Complex Systems* 1695
- 848
- 849 **Doniwa Y, Ueda M, Ueta M, Wada A, Kadowaki K, Tsutsumi N** (2010) The involvement of  
850 a PPR protein of the P subfamily in partial RNA editing of an *Arabidopsis* mitochondrial  
851 transcript. *Gene*; 454: 39-46
- 852
- 853 **Emmert-Streib F, Dehmer M, Haibe-Kains B** (2014) Gene regulatory networks and their  
854 applications: understanding biological and medical problems in terms of networks. *Front Cell*  
855 *Dev Biol* 2:38
- 856
- 857 **Goda H, Sasaki E, Akiyama K, Maruyama-Nakashita A, Nakabayashi K, Li W, Ogawa M,**  
858 **Yamauchi Y, Preston J, Aoki K, Kiba T, Takatsuto S, Fujioka S, Asami T, Nakano T, Kato**

859 **H, Mizuno T, Sakakibara H, Yamaguchi S, Nambara E, Kamiya Y, Takahashi H, Hirai MY,**  
860 **Sakurai T, Shinozaki K, Saito K, Yoshida S, Shimada Y** (2008) The AtGenExpress hormone  
861 and chemical treatment data set: experimental design, data evaluation, model data analysis  
862 and data access. *Plant J* 55: 526–542  
863  
864 **Ghifari AS, Gill-Hille M, Murcha MW** (2018) Plant mitochondrial protein import: the ins and  
865 outs. *Biochem J* 475 (13) 2191-2208  
866  
867 **Haili N, Planchard N, Arnal N, Quadrado M, Vrielynck N, Dahan J, des Francs-Small CC,**  
868 **Mireau H** (2016) The MTL1 pentatricopeptide repeat protein is required for both translation  
869 and splicing of the mitochondrial NADH DEHYDROGENASE SUBUNIT7 mRNA in  
870 *Arabidopsis*. *Plant Phys* 170, 354–366.  
871  
872 **Han D, Oh J, Kim K, Lim H, Kim Y** (2007) Crystal structure of YrrB: a TPR protein with an  
873 unusual peptide-binding site. *Biochem Biophys Res Commun* 360: 784-790  
874  
875 **Hodges M, Dello Y, Keech O, Betti M, Raghavendra AS, Sage R, Zhu XG, Allen DK,**  
876 **Weber AP** (2016) Perspectives for a better understanding of the metabolic integration of  
877 photorespiration within a complex plant primary metabolism network. *J Exp Bot* 67: 3015-3026  
878  
879 **Hu C, Lin, SY, Chi, WT, Charng YY** (2012) Recent gene duplication and subfunctionalization  
880 produced a mitochondrial GrpE, the nucleotide exchange factor of the Hsp70 complex,  
881 specialized in thermotolerance to chronic heat stress in *Arabidopsis*. *Plant Physiol* 158, 747–  
882 758  
883  
884 **Kilian J, Whitehead D, Horak J, Wanke D, Weinl S, Batistic O, D'Angelo C, Bornberg-**  
885 **Bauer E, Kudla J, Harter K** (2007) The AtGenExpress global stress expression data set:



886 protocols, evaluation and model data analysis of UV-B light, drought and cold stress  
887 responses. *Plant J* 50: 347–363

888

889 **Kim JH, Han JM, Kim S** (2014) Protein–Protein Interactions and Multi-component Complexes  
890 of Aminoacyl-tRNA Synthetases. In: Kim S. (eds) *Aminoacyl-tRNA Synthetases in Biology and*  
891 *Medicine*. Topics in Current Chemistry, vol 344. Springer, Dordrecht

892

893 **Klodmann J, Sunderhaus S, Nimitz M, Jänsch L, Braun HP** (2010) Internal architecture of  
894 mitochondrial complex I from *Arabidopsis thaliana*. *Plant Cell* 22: 797–810

895

896 **Liesecke F, Daudu D, Dugé de Bernonville R, Besseau S, Clastre M, Courdavault V, de**  
897 **Craene JO, Crèche J, Giglioli-Guivarc’h N, Glévarec G, Pichon O & Dugé de Bernonville**  
898 **T** (2018) Ranking genome-wide correlation measurements improves microarray and RNA-seq  
899 based global and targeted co-expression networks. *Sci Rep* 8(1):10885.

900

901 **Lindén P, Keech O, Stenlund H, Gardeström P, Moritz T** (2016) Reduced mitochondrial  
902 malate dehydrogenase activity has a strong effect on photorespiratory metabolism as revealed  
903 by <sup>13</sup>C labelling. *J Exp Bot* 67(10): 3123-35

904

905 **Ma S, Gong Q, Bohnert HJ** (2007) An *Arabidopsis* gene network based on the graphical  
906 Gaussian model. *Genome Res* 17:1614–1625

907

908 **Ma S, Bohnert HJ, Dinesh-Kumar SP** (2015) AtGGM2014, an *Arabidopsis* gene co-  
909 expression network for functional studies. *Sci China Life Sci* 58:3

910

911 **Manavski N, Guyon V, Meurer J, Wienand U, Brettschneider R** (2012) An essential  
912 pentatricopeptide repeat protein facilitates 5’maturation and translation initiation of rps3 mRNA  
913 in maize mitochondria. *Plant Cell* 24:3087-3105.

914

915 **Nygaard V, Rødland E. A, Hovig E** (2016). Methods that remove batch effects while retaining  
916 group differences may lead to exaggerated confidence in downstream analyses. *Biostatistics*  
917 17 29–39

918

919 **Peters K, Belt K, Braun HP** (2013) 3D gel map of arabidopsis complex I. *Front Plant Sci* 4,  
920 153.

921

922 **Pons P, Latapy M** (2005) Computing communities in large networks using random walks.  
923 *Comp Info Sci*; 3733:284-93.

924

925 **Qian X, Dougherty ER** (2013) Validation of gene regulatory network inference based on  
926 controllability. *Frontiers in genetics*. 2013;4:272. Epub 2014/01/01.

927

928 **R Core Team** (2018). R: A language and environment for statistical computing. R Foundation  
929 for Statistical Computing, Vienna, Austria. URL <https://www.R-project.org/>.

930

931 **Rapala-Kozik M, Wolak N, Kujda M, Banas AK** (2012) The upregulation of thiamine (vitamin  
932 B1) biosynthesis in *Arabidopsis thaliana* seedlings under salt and osmotic stress conditions is  
933 mediated by abscisic acid at the early stages of this stress response. *BMC Plant Biol*12: 2-2

934

935 **Ren Z, Sun T, Zhang C-H, Zhou HH** (2015) Asymptotic normality and optimalities in  
936 estimation of large Gaussian graphical models. *Ann Statist* 43(3):991-1026.

937

938 **Schmid M, Davison TS, Henz SR, Pape UJ, Demar M, Vingron M, Scholkopf B, Weigel D,**  
939 **Lohmann JU** (2005) A gene expression map of *Arabidopsis thaliana* development. *Nat Genet*  
940 37: 501–506

941

- 942 **Schmitz-Linneweber C, Small I** (2008) Pentatricopeptide repeat proteins: a socket set for  
943 organelle gene expression. *Trends Plant Sci* 13: 663-70  
944
- 945 **Shannon P, Markiel A, Ozier O, Baliga N, Wang J, Ramage D, Amin N, Schwikowski B,**  
946 **Ideker T** (2003) Cytoscape: a software environment for integrated models of biomolecular  
947 interaction networks. *Genome Res* 13:2498-2504.  
948
- 949 **Tomaz T, Bagard M, Pracharoenwattana I, Lindén P, Lee CP, Carroll AJ, Stroher E, Smith**  
950 **SM, Gardeström P, Millar AH** (2010). Mitochondrial Malate Dehydrogenase Lowers Leaf  
951 Respiration and Alters Photorespiration and Plant Growth in *Arabidopsis*. *Plant Phys* 154:  
952 1143-1157  
953
- 954 **Usadel B, Obayashi T, Mutwil M, Giorgi FM, Bassel GW, Tanimoto M, Chow A,**  
955 **Steinhauser D, Persson S, Provart NJ** (2009) Co-expression tools for plant biology:  
956 Opportunities for hypothesis generation and caveats. *Plant Cell Environ* 32: 1633–1651  
957
- 958 **Wang T, Ren Z, Ding Y, Fang Z, Sun Z, MacDonald ML, Sweet RA, Wang J, Chen W** (2016)  
959 FastGGM: An Efficient Algorithm for the Inference of Gaussian Graphical Model in Biological  
960 Networks. *PLoS comp biol* 12(2):e1004755  
961
- 962 **Wille A, Zimmermann P, Vranová E, Fürholz A, Laule O, Bleuler S, Hennig L, Prelić A,**  
963 **von Rohr P, Thiele L, Zitzler E, Gruissem W, Bühlmann P** (2004) Sparse graphical  
964 Gaussian modeling of the isoprenoid gene network in *Arabidopsis thaliana*. *Genome Biol*  
965 5:R92  
966

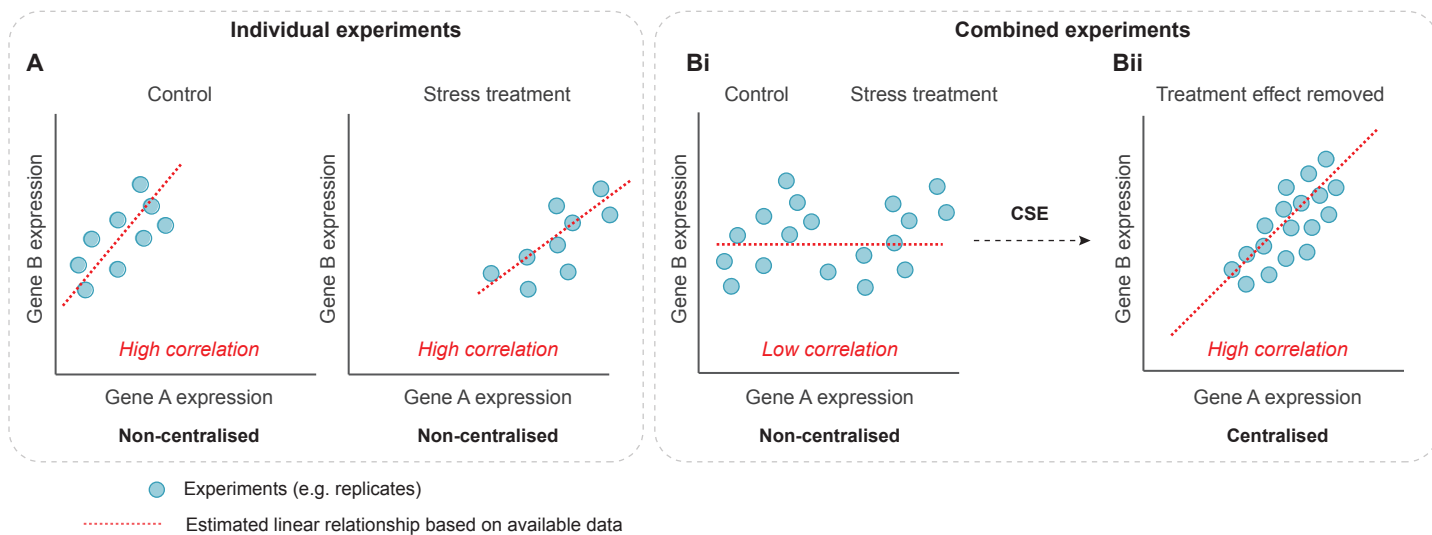

**Figure 1. Schematic illustrating the utility of centralisation when comparing genes from a diverse background of treatments. (A)** Conventional correlation analysis of two genes (Gene A and Gene B) under control conditions reveals a high positive correlation. Corresponding correlation analysis of the same two genes in response to a stress treatment again reveals a high positive correlation. **(Bi)** When both the control and stress experiments are combined, conventional correlation analysis results in a low level of correlation (false negative). **(Bii)** By carrying out *centralisation within sub-experiments* (CSE), the mean effect between replicates is removed, and subsequent conventional correlation analysis now reveals the “core” high correlation between Gene A and Gene B.

### A Non-CSE Pearson correlation

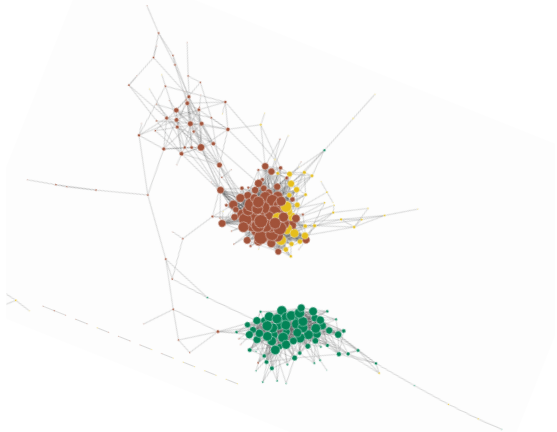

**Nodes: 288**  
■ Below-ground: 151 (52%)  
■ Above-ground: 76 (26%)  
■ Neither: 64 (22%)

### B Non-CSE partial correlation

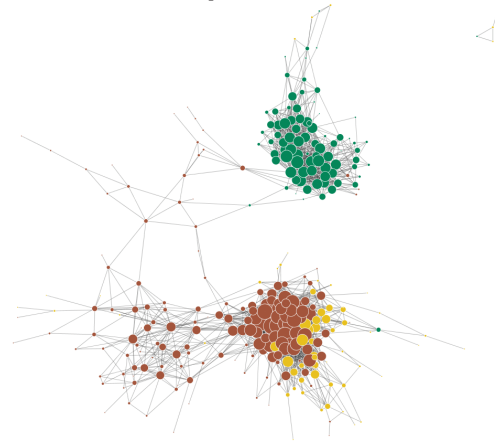

**Nodes: 325**  
■ Below-ground: 172 (53%)  
■ Above-ground: 83 (25%)  
■ Neither: 72 (22%)

### C CSE Pearson correlation

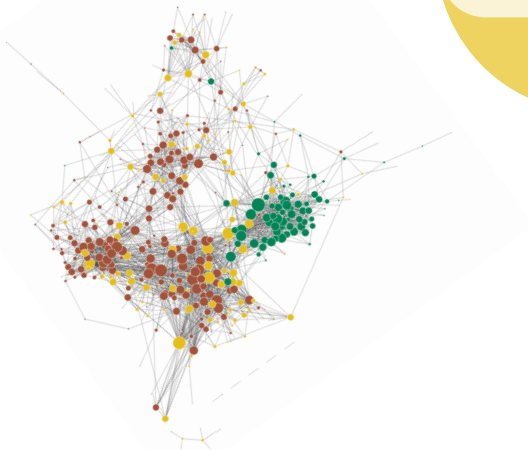

**Nodes: 490**  
■ Below-ground: 238 (49%)  
■ Above-ground: 86 (17%)  
■ Neither: 169 (34%)

### D CSE partial correlation

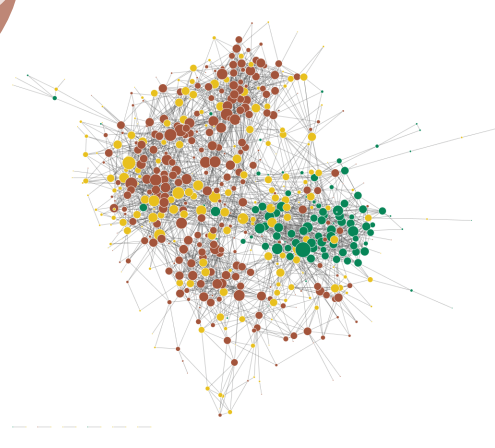

**Nodes: 585**  
■ Below-ground: 272 (46%)  
■ Above-ground: 103 (18%)  
■ Neither: 212 (36%)

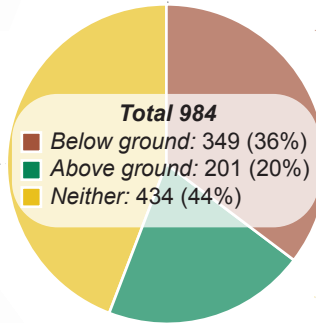

**A**

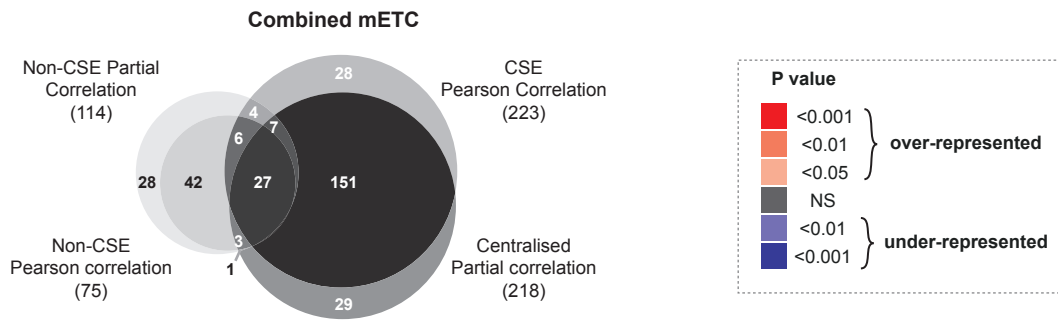

**B**

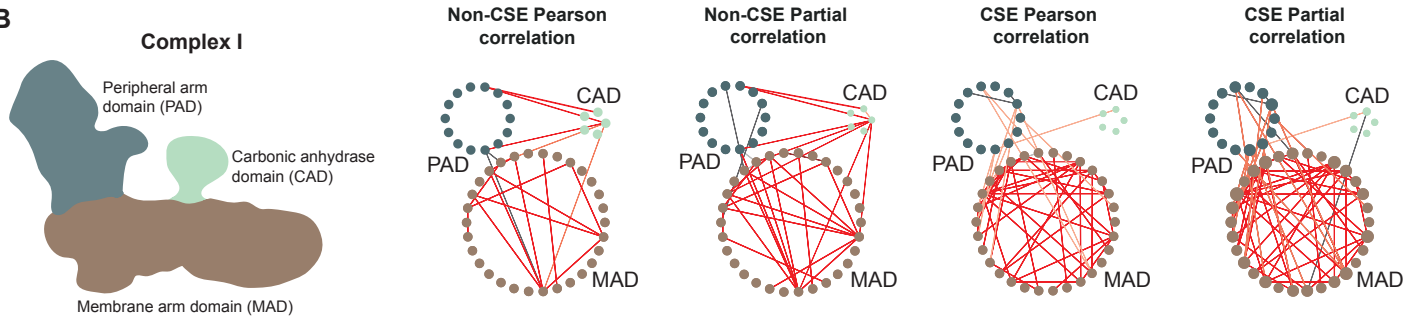

**C**

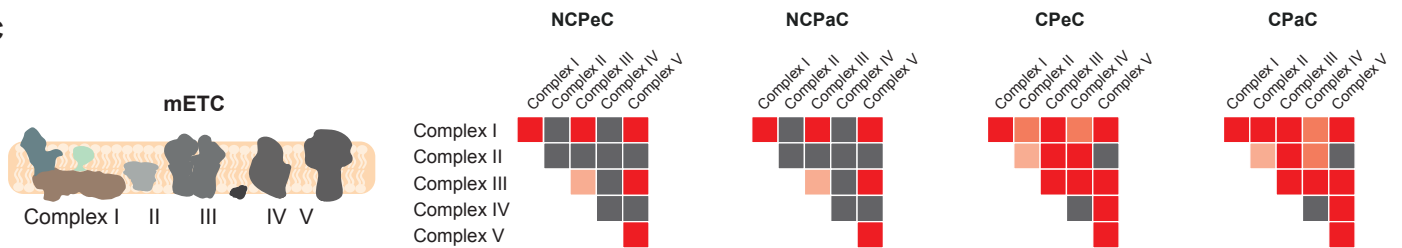

**D**

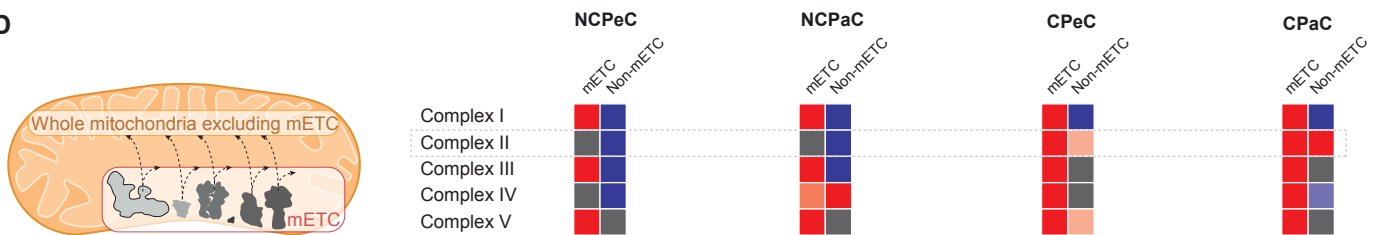

**A) Non-CSE Pearson correlation**

9 functions enriched with intra-category edges

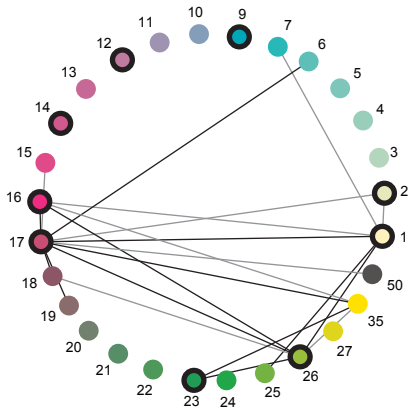

**B) Non-CSE Partial correlation**

11 functions enriched with intra-category edges

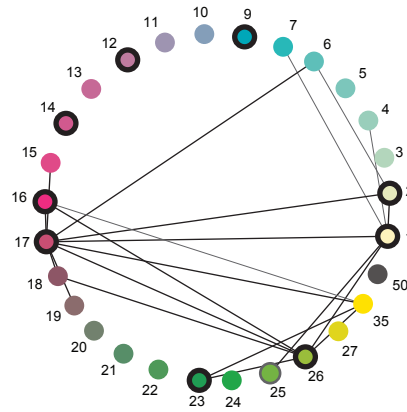

**Functional Annotations (MapMan 2018)**

- |    |                           |
|----|---------------------------|
| 1  | Photosynthesis            |
| 2  | Cellular respiration      |
| 3  | Carbohydrate metabolism   |
| 4  | Amino acid metabolism     |
| 5  | Lipid metabolism          |
| 6  | Nucleotide metabolism     |
| 7  | Coenzyme metabolism       |
| 8  | Polyamine metabolism      |
| 9  | Secondary metabolism      |
| 10 | Redox homeostasis         |
| 11 | Phytohormones             |
| 12 | Chromatin organisation    |
| 13 | Cell cycle                |
| 14 | DNA damage response       |
| 15 | RNA biosynthesis          |
| 16 | RNA processing            |
| 17 | Protein biosynthesis      |
| 18 | Protein modification      |
| 19 | Protein degradation       |
| 20 | Cytoskeleton              |
| 21 | Cell wall                 |
| 22 | Vesicle trafficking       |
| 23 | Protein translocation     |
| 24 | Solute transport          |
| 25 | Nutrient uptake           |
| 26 | External stimuli response |
| 27 | Multi-process regulation  |
| 35 | Not assigned              |
| 50 | Enzyme function           |

**C) CSE Pearson correlation**

18 functions enriched with intra-category edges

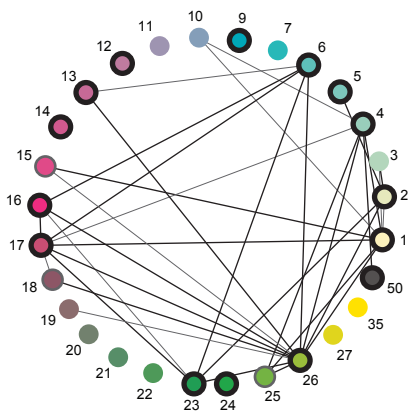

**D) CSE Partial correlation**

18 functions enriched with intra-category edges

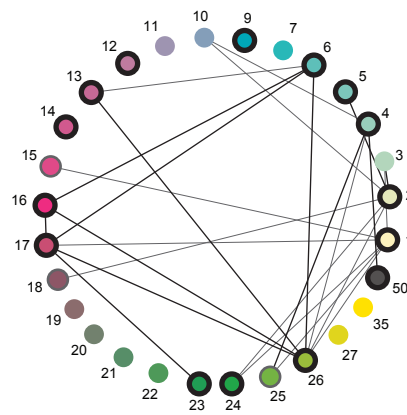

- |  |                                                                            |  |                                                                            |
|--|----------------------------------------------------------------------------|--|----------------------------------------------------------------------------|
|  | Significant ( $p < 0.001$ ) number of edges between functional categories  |  | No significant ( $p > 0.01$ ) number of edges within a functional category |
|  | Significant ( $p < 0.0001$ ) number of edges between functional categories |  | Significant ( $p < 0.01$ ) number of edges within a functional category    |
|  |                                                                            |  | Significant ( $p < 0.001$ ) number of edges within a functional category   |

**A**

Mitochondrial proteins with no assigned function (NAF) n=111

Mitochondrial proteins with annotated functions n=257

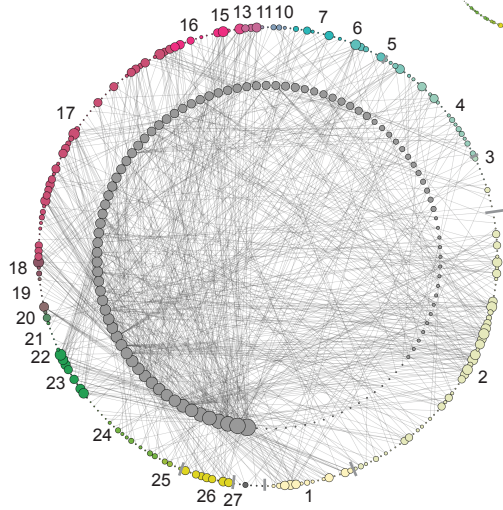

**Functional Annotations (MapMan, 2018)**

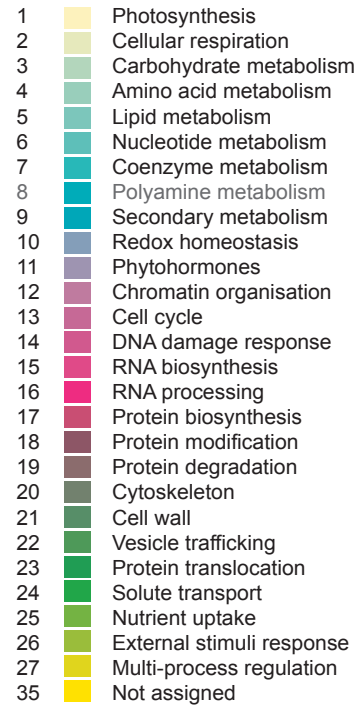

**B** Top 5 proteins with highest number of edges to mitochondrial proteins with known functions

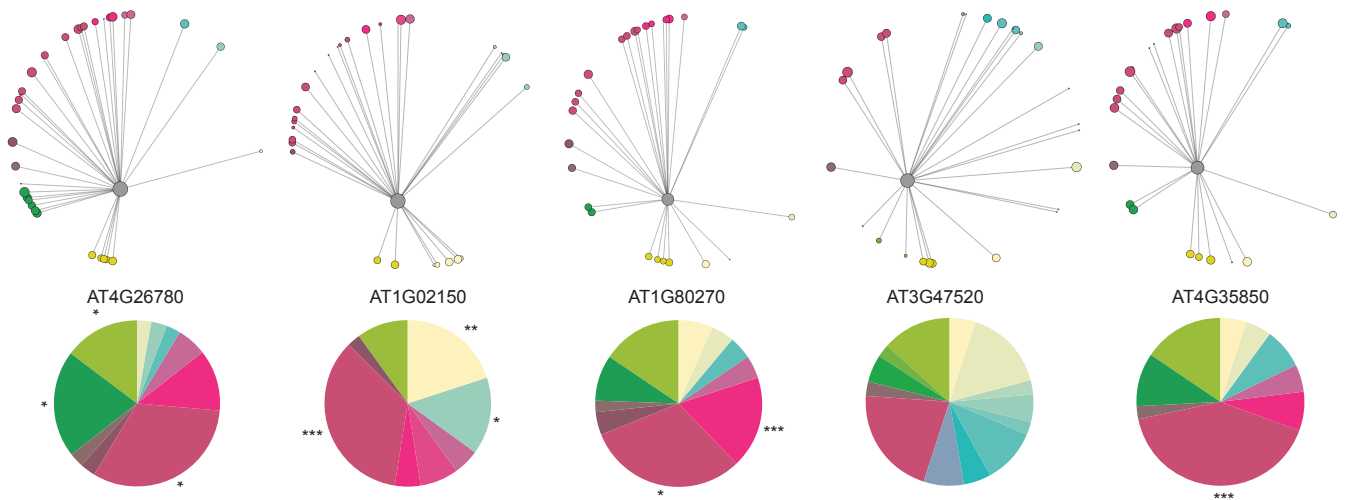

\*Protein biosynthesis organelle translation machineries  
\*Protein translocation  
\*External stimuli response  
- heat-shock-responsive protein

\*\*Photosynthesis  
\*Amino Acid metabolism  
\*\*\*Protein biosynthesis  
- aminoacyl-tRNA synthetase

\*\*\*RNA processing  
\*Protein biosynthesis - organelle translation machineries

\*\*\*Protein biosynthesis - organelle translation machineries



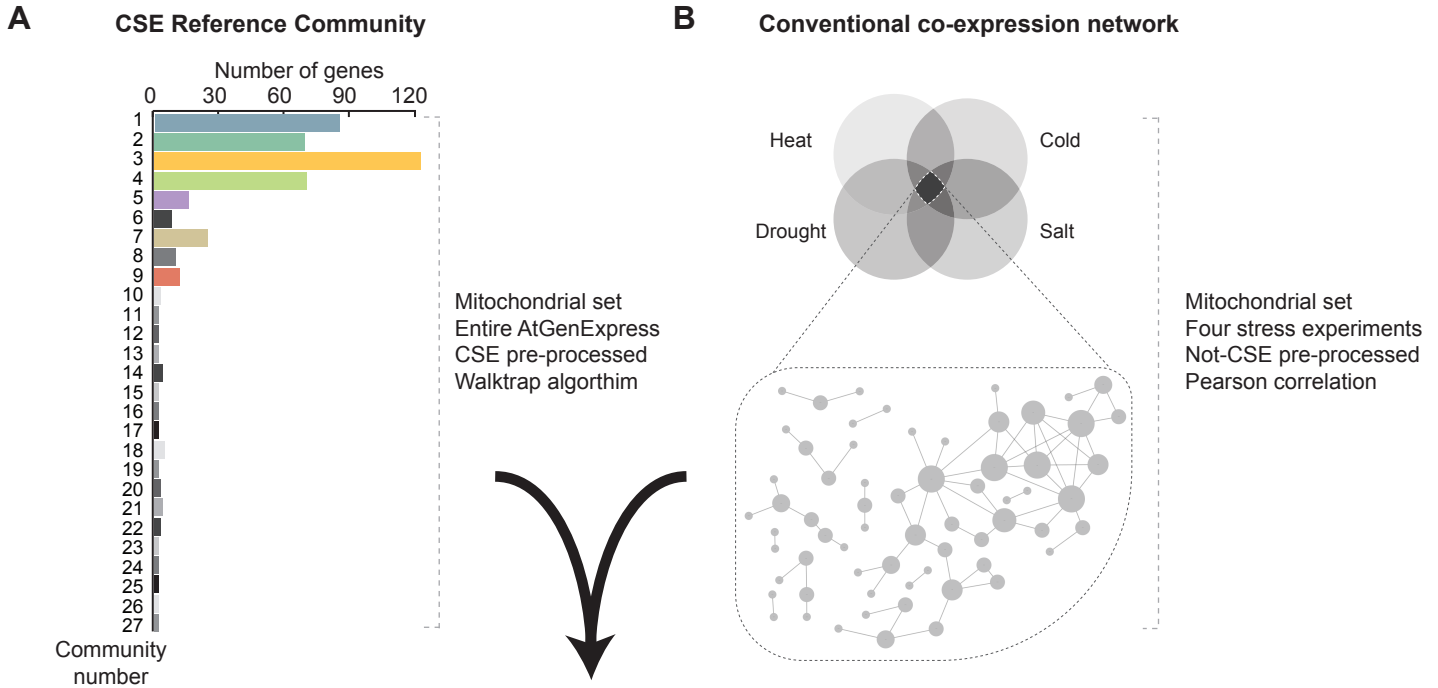

**C Co-expression network augmented with a CSE Reference Community**

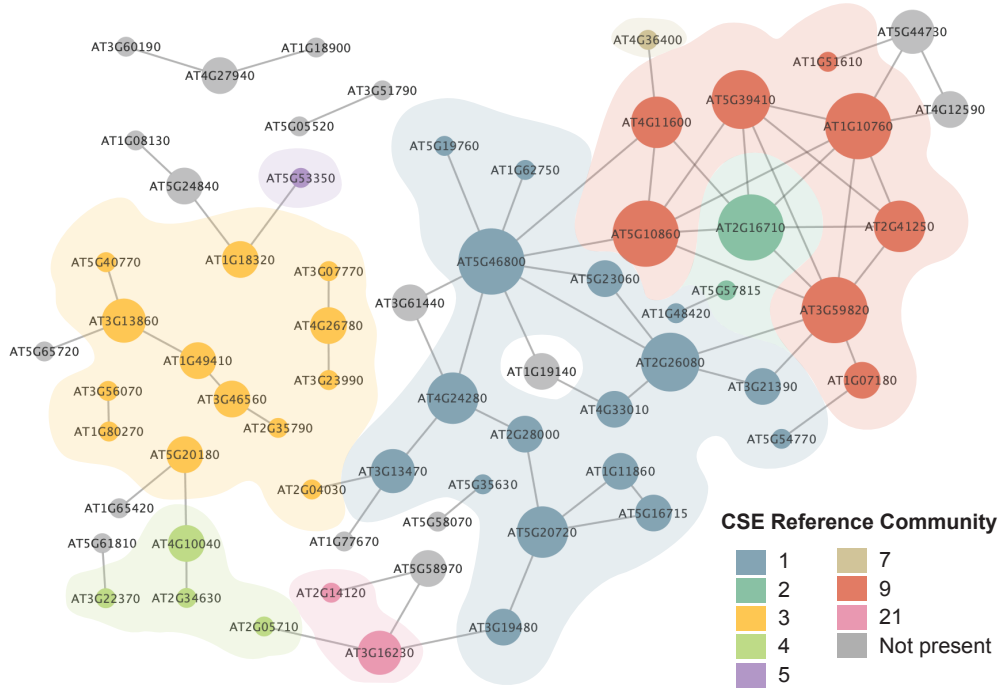

Source: https://www.biorxiv.org/content/10.1101/682492v1.full.pdf
