# Supplementary material for: Enhancing the biological relevance of Gene Co-expression Networks: A plant mitochondrial case study
Source: bioRxiv or medRxiv preprint supplement (doi:10.1101/682492), 2019-06-27
Supplement: Supplementary file [file media-1.pdf]

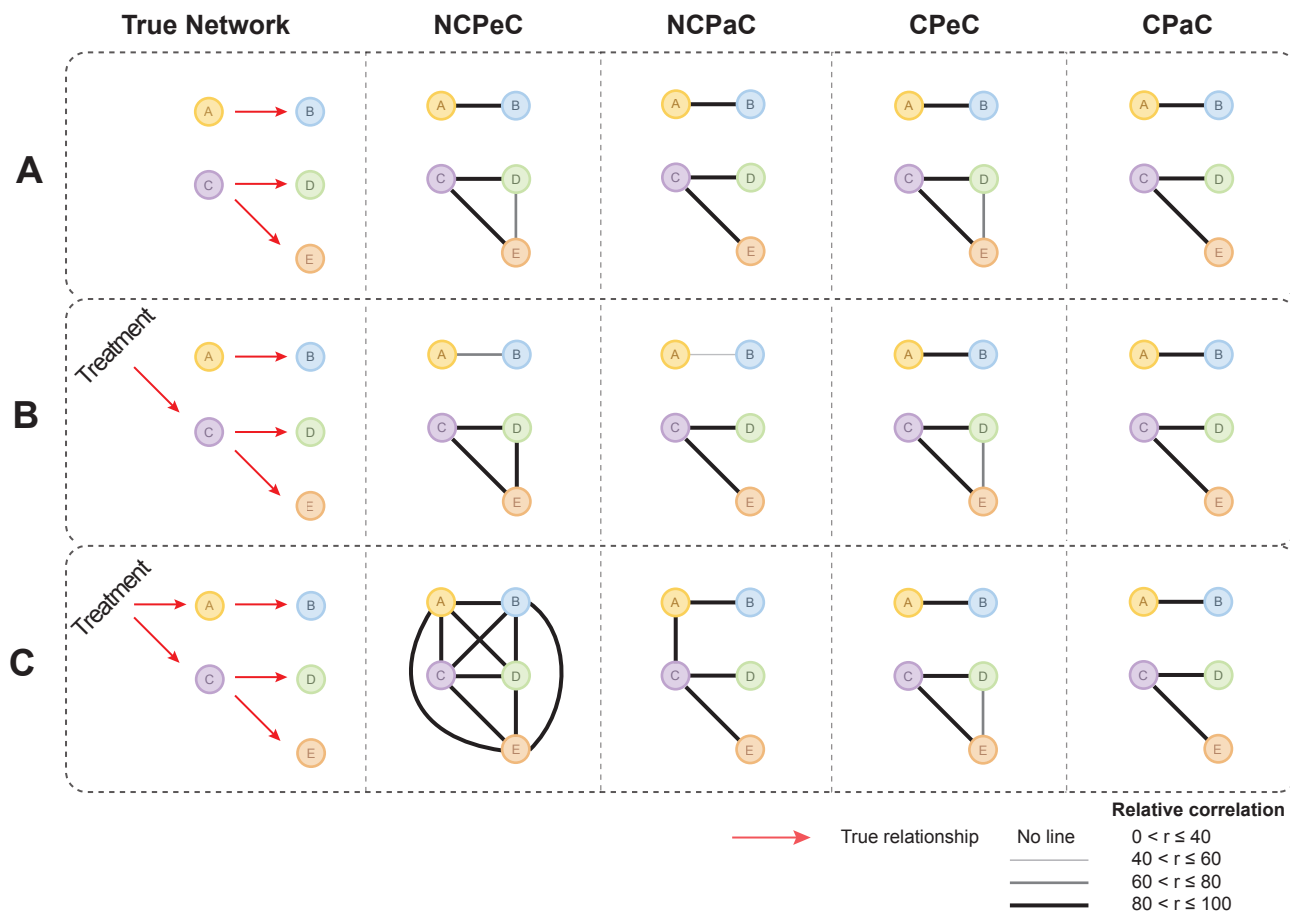

**Supplemental Figure 1. Schematic representations of the conclusions that can be drawn from different correlation analysis approaches of gene expression data.** Five genes were simulated to illustrate a network in the following way; Gene A expression affects Gene B expression, Gene C expression affects the expression of Gene D and Gene E. The gene's expression values are regarded as functions of a normally distributed random variable, with a mean  $\mu=0$ , and a standard deviation  $\sigma=0.5$ . The expression of two of the genes, Gene A and Gene C are also affected by an external stress treatment, which can be seen as a categorical variable with two levels. Level one represent no external influences and the variable takes a value of zero, at level two the gene is influenced by an external factor and the categorical variable takes the value ten. Gene B expression is affected by the expression of Gene A, so for each Gene B value a Gene A value multiplied by a constant  $\beta=0.5$  is added. In the same way, Gene D and Gene E is simulated but with the exception that they are affected by Gene C. For each of the scenarios 100 expression values were simulated for each gene. To compare Pearson's correlation against partial correlation the relative correlation, i.e. the most correlated edge, was set as a baseline and received a correlation value of 1. This was done for each setup. In the first column the true network is represented and if it is affected by the external factor. In column 2 to 5 the strength of the relative correlations is represented by the thickness of the line. **(A)** The network is not affected by any external factor and all four methods have the correct edges among the top three candidates. There is no difference between non-centralised and centralised data which is as expected when there is no external factor to remove with CSE. **(B)** The stress treatment is affecting gene C expression, which has an effect on the non-centralised networks. Pearson correlation gives a false positive among the top three candidates, the partial correlation networks gives the correct top three candidates but the edge between Gene A and B is weak. When we preform CSE both networks give the correct top three edges. **(C)** In this case, the stress treatment is affecting the expression of both Gene A and C, which leads to false positives with both methods. By carrying out CSE, the stress treatment, is removed and both Pearson and partial correlation output the correct top three edges.

| Reference Community | Locus ID  | Symbol     | ARAPORT11 Description                                 | Functional Enrichment | Reference Community | Locus ID  | Symbol                                                         | ARAPORT11 Description               |
|---------------------|-----------|------------|-------------------------------------------------------|-----------------------|---------------------|-----------|----------------------------------------------------------------|-------------------------------------|
| 1                   | AT2G28000 | CPN6-A     | chaperonin-60alpha                                    | Photorespiration      | 4                   | AT2G05710 | ACO3                                                           | aconitase 3                         |
| 1                   | AT3G13470 | CPN6-BETA2 | TCP-1/cpn60 chaperonin family protein                 |                       | 4                   | AT4G10040 | CYTC-2                                                         | cytochrome c-2                      |
| 1                   | AT5G20720 | CPN2       | chaperonin 20                                         |                       | 4                   | AT3G22370 | AOX1A                                                          | alternative oxidase 1A              |
| 1                   | AT4G33010 | GLDP1      | glycine decarboxylase P-protein 1                     |                       | 4                   | AT2G34630 | GPS1                                                           | geranyl diphosphate synthase 1      |
| 1                   | AT2G26080 | GLDP       | glycine decarboxylase P-protein 2                     |                       | 5                   | AT5G53350 | CLPX                                                           | CLP protease regulatory subunit X   |
| 1                   | AT1G11860 | -          | Glycine cleavage T-protein family                     |                       | 7                   | AT4G36400 | D2HGDH                                                         | FAD-linked oxidases family protein  |
| 1                   | AT5G46800 | BOU        | Mitochondrial substrate carrier family protein        |                       | 9                   | AT1G07180 | NDA1                                                           | alternative NAD(P)H dehydrogenase 1 |
| 1                   | AT5G35630 | GS2        | glutamine synthetase 2                                |                       | 9                   | AT1G10760 | SEX1                                                           | Pyruvate phosphate dikinase         |
| 1                   | AT3G19480 | 3-PGDH     | D-3-phosphoglycerate dehydrogenase                    |                       | 9                   | AT4G11600 | GPX6                                                           | glutathione peroxidase 6            |
| 1                   | AT5G19760 | -          | Mitochondrial substrate carrier family protein        |                       | 9                   | AT1G51610 | -                                                              | Cation efflux family protein        |
| 1                   | AT3G21390 | -          | Mitochondrial substrate carrier family protein        | 9                     | AT5G39410           | -         | Saccharopine dehydrogenase                                     |                                     |
| 1                   | AT5G4770  | THI1       | thiazole biosynthetic enzyme                          | 9                     | AT5G10860           | CBSX3     | Cystathionine beta-synthase family protein                     |                                     |
| 1                   | AT5G16715 | EMB2247    | protein EMBRYO DEFECTIVE 2247                         | 9                     | AT3G59820           | LETM1     | LETM1-like protein                                             |                                     |
| 1                   | AT1G62750 | SCO1       | Translation elongation factor EFG/EF2 protein         | 9                     | AT2G41250           | -         | Haloacid dehalogenase-like hydrolase superfamily protein       |                                     |
| 1                   | AT4G24280 | cpHsc7--1  | chloroplast heat shock protein 70-1                   | 21                    | AT2G14120           | DRP3B     | dynamain related protein                                       |                                     |
| 1                   | AT5G23060 | CaS        | calcium sensing receptor                              | 21                    | AT3G16230           | -         | Putative eukaryotic LigT                                       |                                     |
| 1                   | AT1G48420 | D-CDES     | D-cysteine desulfhydrase                              | NP                    | AT5G58970           | UCP2      | uncoupling protein 2                                           |                                     |
| 2                   | AT5G57815 | -          | Cytochrome c oxidase, subunit Vib family protein      | NP                    | AT3G51790           | G1        | transmembrane protein G1P-related 1                            |                                     |
| 2                   | AT2G16710 | -          | Iron-sulfur cluster biosynthesis family protein       | NP                    | AT5G65720           | NFS1      | nitrogen fixation S (NIFS)-like 1                              |                                     |
| 3                   | AT5G20180 | -          | Ribosomal protein L36                                 | NP                    | AT1G19140           | COQ9      | ubiquinone biosynthesis COQ9-like protein                      |                                     |
| 3                   | AT3G56070 | ROC2       | rotamase cyclophilin 2                                | NP                    | AT1G08130           | LIG1      | DNA ligase 1                                                   |                                     |
| 3                   | AT5G40770 | PHB3       | prohibitin 3                                          | NP                    | AT5G24840           | TRM8A     | tRNA (guanine-N-7) methyltransferase                           |                                     |
| 3                   | AT1G49410 | TOM6       | translocase of the outer mitochondrial membrane 6     | NP                    | AT3G60190           | DL1E      | DYNAMIN-like 1E                                                |                                     |
| 3                   | AT1G18320 | -          | Mitochondrial import Tim17/Tim22/Tim23 family protein | NP                    | AT5G05520           | -         | Outer membrane OMP85 family protein                            |                                     |
| 3                   | AT3G46560 | TIM9       | Tim10/DDP family zinc finger protein                  | NP                    | AT5G61810           | APC1      | Mitochondrial substrate carrier family protein                 |                                     |
| 3                   | AT3G13860 | HSP60-3A   | heat shock protein 60-3A                              | NP                    | AT4G27940           | MTM1      | manganese tracking factor for mitochondrial SOD2               |                                     |
| 3                   | AT3G23990 | HSP6       | heat shock protein 60                                 | NP                    | AT1G65420           | NPQ7      | antigen receptor-like protein (DUF565)                         |                                     |
| 3                   | AT3G07770 | Hsp89.1    | HEAT SHOCK PROTEIN 89.1                               | NP                    | AT1G77670           | -         | Pyridoxal phosphate dependent transferases superfamily protein |                                     |
| 3                   | AT2G04030 | CR88       | Chaperone protein htpG family protein                 | NP                    | AT5G58070           | TIL       | temperature-induced lipocalin                                  |                                     |
| 3                   | AT1G80270 | PPR596     | PENTATRICOPEPTIDE REPEAT 596                          | NP                    | AT1G18900           | -         | Pentatricopeptide repeat superfamily protein                   |                                     |
| 3                   | AT4G26780 | MGE2       | Co-chaperone GrpE family protein                      | NP                    | AT5G44730           | -         | Haloacid dehalogenase-like hydrolase superfamily protein       |                                     |
| 3                   | AT2G35790 | -          | transmembrane protein                                 | NP                    | AT4G12590           | -         | ER membrane protein complex subunit-like protein               |                                     |
|                     |           |            |                                                       |                       | NP                  | AT3G61440 | CYSC1                                                          | cysteine synthase C1                |

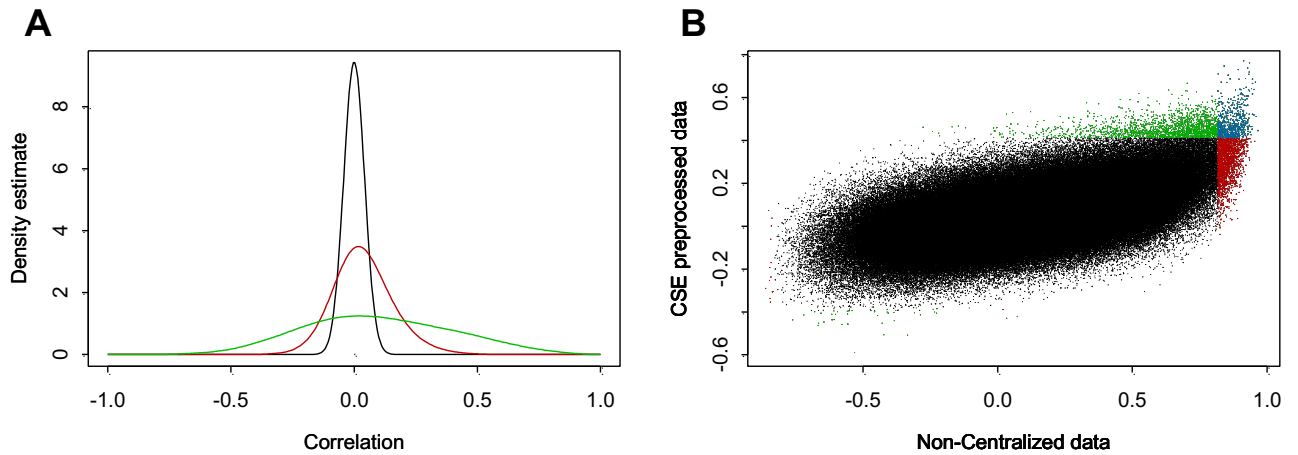

**Supplemental Figure 3. Correlation between the 985 mitochondrion related genes were estimated using Pearson correlation without centralization (Non-Centralized data) and Pearson correlation with CSE preprocessing (CSE preprocessed data).** For each approach 484,620 correlations were estimated and the 0.5 % (2423) gene correlations with the highest absolute value were used to predict edges in the corresponding gene co-expression network. **(A)** Estimated density functions over all estimated correlations for non-centralized data (green) and CSE preprocessed data (red). The black line shows the density for correlations estimated on simulated noise. **(B)** The estimated correlations for the two approaches plotted against each other. Edges shared by both approaches are marked blue (620 (25.6 %) of the edges were shared), unique edges for the CSE preprocessing network are marked red, and unique edges for the Non-centralized network are marked green.
